# Supplementary material
Source: publisher figshare collection journal article supplement (https://acs.figshare.com/ndownloader/files/4783351)
Supplement: Supplementary file 1 [file 4783351]

## **Supporting Information**

### **Oligoresorcinols fold into double helices in water**

**Hidetoshi Goto<sup>1</sup>, Hiroshi Katagiri<sup>1</sup>, Yoshio Furusho<sup>1</sup>, and Eiji Yashima<sup>1,2</sup>**

<sup>1</sup>Yashima Super-structured Helix Project. Exploratory Research for Advanced Technology (ERATO), Japan Science and Technology Agency (JST), Creation Core Nagoya 101, 2266-22 Anagahora, Shimoshidami, Moriyama-ku, Nagoya 463-0003, Japan.

<sup>2</sup>Institute for Advanced Research, Nagoya University, Chikusa-ku, Nagoya 464-8603, Japan.

\*To whom correspondence should be addressed. E-mail: furusho@yp-jst.jp (Y.F.); yashima@apchem.nagoya-u.ac.jp (E.Y.).

## Table of Contents

|                                                                       |            |
|-----------------------------------------------------------------------|------------|
| <b>1. Instruments</b>                                                 | <b>S3</b>  |
| <b>2. Materials</b>                                                   | <b>S4</b>  |
| <b>3. Synthetic Procedures</b>                                        |            |
| <b>3-1. Synthesis of Achiral Oligoresorcinols</b>                     | <b>S5</b>  |
| <b>3-2. Synthesis of Chiral Oligoresorcinols</b>                      | <b>S17</b> |
| <b>4. Investigation of Double Helix Formation of Oligoresorcinols</b> |            |
| <b>4-1. Concentration Effect</b>                                      | <b>S31</b> |
| <b>4-2. Temperature Effect</b>                                        | <b>S32</b> |
| <b>4-3. VPO Measurement</b>                                           | <b>S36</b> |
| <b>4-4. Chain Length Dependence of Absorption Spectra</b>             | <b>S37</b> |
| <b>4-5. Molecular Modeling and Calculations</b>                       | <b>S38</b> |
| <b>4-6. Single-Crystal X-ray Analysis</b>                             |            |
| <b>4-6-1. Single Helix of 5merH</b>                                   | <b>S41</b> |
| <b>4-6-2. Double Helix of 5merH</b>                                   | <b>S46</b> |

## 1. Instruments

The melting points were measured using a Yanaco MP-500D melting point apparatus (Kyoto, Japan) and were uncorrected. The solution pH was measured with a Horiba B-211 pH meter (Kyoto, Japan) or a DKK-TOA GST-5428S pH meter (Tokyo, Japan). The NMR spectra were obtained using a Varian UNITY INOVA 500AS spectrometer operating at 500 MHz for  $^1\text{H}$  and 125 MHz for  $^{13}\text{C}$ . Chemical shifts are reported in parts per million ( $\delta$ ) downfield from tetramethylsilane (TMS) as the internal standard in  $\text{CDCl}_3$  and from acetone or 1,4-dioxane dissolved in  $\text{D}_2\text{O}$  as the external standard in  $\text{D}_2\text{O}$  and  $\text{CD}_3\text{OD}$ . The electron spray ionization mass spectra (ESI-MS) were recorded using a Jeol JMS-T100CS spectrometer (Akishima, Japan). The matrix-assisted laser desorption-ionization time-of-flight mass spectra (MALDI-TOF-MS) were measured using a Shimadzu AXIMA-CFR Plus spectrometer (Kyoto, Japan). The elemental analyses were performed by the Nagoya University Analytical Laboratory in the Graduate School of Engineering. The IR spectra were recorded using a Jasco Fourier Transform IR-680 spectrophotometer (Hachioji, Japan). The absorption and CD spectra were measured in a 0.2- or 1.0-mm quartz cell on a Jasco V-570 spectrophotometer and a Jasco J-820 spectropolarimeter, respectively. The temperature was controlled by a Jasco PTC-423L apparatus ( $-10$  to  $90^\circ\text{C}$ ). Optical rotations were taken using a Jasco P-1030 polarimeter in water and methanol in a 5-cm quartz cell equipped with a temperature controller (EYELA NCB-2100). The molecular weights of the oligomer aggregates in water were estimated using a Gonotec

070 vapor pressure osmometer (VPO) (Berlin, Germany) with NaCl (300 mOsmol/kg) as the standard. The samples were prepared in the range of 5–20 mmol/kg. The single crystal X-ray data were collected using a Bruker Smart Apex (153 K) or a Bruker Smart ApexII (90 K) CCD-based X-ray diffractometer with Mo-K $\alpha$  radiation ( $\lambda$  = 0.71073 Å).

## 2. Materials

All starting materials and dehydrated solvents were purchased from Aldrich, Wako Pure Chemical Industries (Osaka, Japan), and Tokyo Kasei Kogyo (Tokyo, Japan). 1,3-Diiodo-5,5-dimethylhydantoin (DIH) was kindly supplied from Nippoh Chemicals Co., Ltd. (Tokyo, Japan). Triethylamine (NEt<sub>3</sub>) was distilled over CaH<sub>2</sub> under Ar after being stirred with KOH pellets overnight under Ar. The distilled water and D<sub>2</sub>O (99.9 atom %D) purchased from Wako and Cambridge Isotope Laboratories (Andover, MA, USA), respectively, were degassed with Ar and used throughout all the experiments. Silica gel (SiO<sub>2</sub>) and aminopropyl-modified silica gel (NH<sub>2</sub>-SiO<sub>2</sub>) for the flash chromatography were purchased from Merck and Fuji Silysia Chemical Ltd. (Kasugai, Japan), respectively.

### 3. Synthetic Procedures

#### 3-1. Synthesis of Achiral Oligoresorcinols

Achiral oligoresorcinols were synthesized according to Scheme S-1. **1merBr**,<sup>1</sup> **1merB**,<sup>2</sup> and **1merBr2**<sup>3</sup> were prepared by the previously reported methods. The reaction progresses were monitored by TLC or ESI-MS.

**Scheme S-1. Synthesis of Resorcinol Oligomers (3–9merH)<sup>a</sup>**

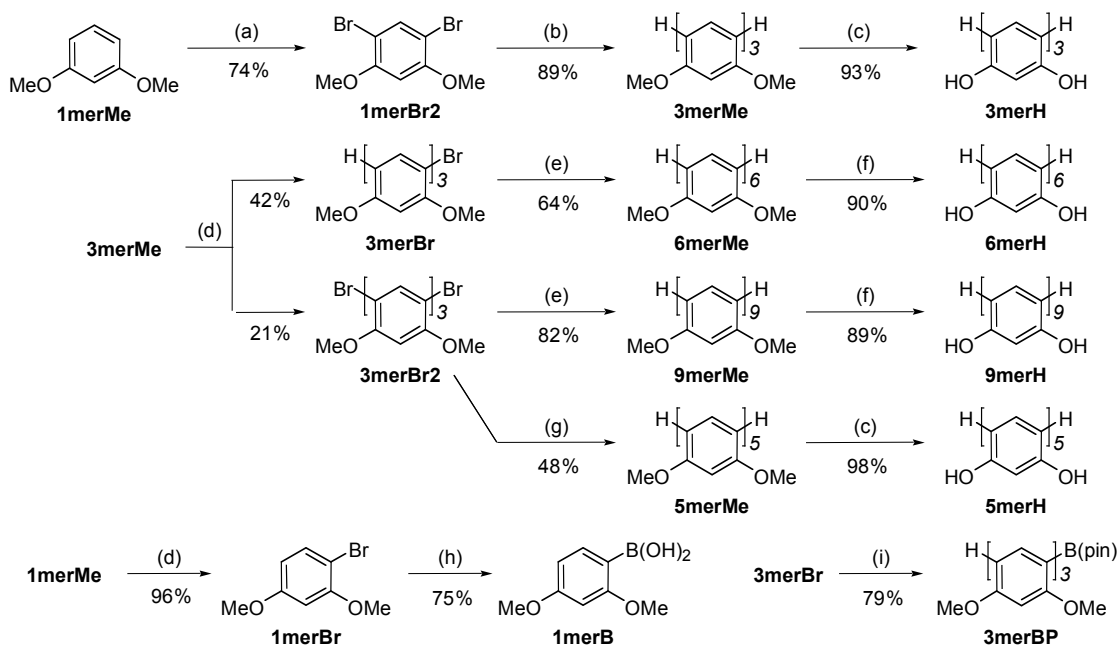

<sup>a</sup> Reagents and conditions: (a) HBr, DMSO, reflux, 1 day; (b) **1merB**, Pd(PPh<sub>3</sub>)<sub>4</sub>, Na<sub>2</sub>CO<sub>3</sub>, THF, H<sub>2</sub>O, reflux, 1 week; (c) BBr<sub>3</sub>, -78°C, 1 day; (d) DBH, THF, 0°C, 1 day; (e) **3merBP**, Pd(PPh<sub>3</sub>)<sub>4</sub>, K<sub>2</sub>CO<sub>3</sub>, THF, H<sub>2</sub>O, reflux, 2 days; (f) BBr<sub>3</sub>, 0°C, 1 day; (g) **1merB**, Pd(PPh<sub>3</sub>)<sub>4</sub>, K<sub>2</sub>CO<sub>3</sub>, THF, H<sub>2</sub>O, reflux, 4 days; (h) (1) *n*-BuLi, THF, -78°C, 1 h, (2) B(O*i*-Pr)<sub>3</sub>, -78°C, 1 day, (3) H<sub>3</sub>O<sup>+</sup>; (i) pinacolborane, PdCl<sub>2</sub>(PPh<sub>3</sub>)<sub>2</sub>, NEt<sub>3</sub>, 1,4-

dioxane, 80°C, 1 day.

**3merMe [2,4,4',6',2'',4''-Hexamethoxy-1,1':3',1''-terphenyl]<sup>4</sup>**

To a solution of **1merBr2** (25.2 g, 85.3 mmol), **1merB** (31.1 g, 171 mmol) and Pd(PPh<sub>3</sub>)<sub>4</sub> (5.9 g, 4.33 mmol, Aldrich) in dehydrated THF (1 L) was added a degassed solution of Na<sub>2</sub>CO<sub>3</sub> (2 M, 200 mL, 400 mmol) through a cannula under Ar and the mixture was refluxed for 1 week. After most of the solvent had been removed by evaporation, the aqueous solution was extracted with CHCl<sub>3</sub>. The organic layer was dried over MgSO<sub>4</sub>, filtered, and concentrated *in vacuo*. The crude product was purified by SiO<sub>2</sub> chromatography with *n*-hexane/CHCl<sub>3</sub> (2/1 to 0/1, v/v) to obtain **3merMe** as a slightly yellow solid (31 g, 75.5 mmol, 88.8% yield). Mp: 112–113°C. IR (KBr, cm<sup>-1</sup>): 2937, 1607, 1493, 1205, 1164, 1033, 930, 824. <sup>1</sup>H NMR (CDCl<sub>3</sub>): δ 3.76 (s, OMe, 6H), 3.82 (s, OMe, 6H), 3.83 (s, OMe, 6H), 6.53 (dd, Ar-H<sub>5</sub> and 5'', *J* = 8.0, 2.5 Hz, 2H), 6.54 (d, Ar-H<sub>3</sub> and 3'', *J* = 2.5 Hz, 2H), 6.62 (s, Ar-H<sub>5'</sub>, 1H), 7.12 (s, Ar-H<sub>2'</sub>, 1H), 7.19 (d, Ar-H<sub>6</sub> and 6'', *J* = 8.0 Hz, 2H). <sup>13</sup>C NMR (CDCl<sub>3</sub>): δ 55.31, 55.64, 55.85, 96.02, 98.88, 104.14, 119.16, 120.20, 132.12, 134.56, 157.12, 158.10, 159.96. ESI-MS (CH<sub>2</sub>Cl<sub>2</sub>/CH<sub>3</sub>OH (1/1, v/v), positive): Calcd for C<sub>24</sub>H<sub>26</sub>O<sub>6</sub>Na [**3merMe**+Na]<sup>+</sup>: *m/z* = 433.16. Found: *m/z* = 433.20. Anal. Calcd for C<sub>24</sub>H<sub>26</sub>O<sub>6</sub>: C, 70.23; H, 6.38. Found: C, 70.17; H, 6.36.

**3merBr [5-Bromo-2,4,4',6',2'',4''-hexamethoxy-1,1':3',1''-terphenyl] and 3merBr2 [5,5''-Dibromo-2,4,4',6',2'',4''-hexamethoxy-1,1':3',1''-terphenyl]<sup>1</sup>**

To a solution of **3merMe** (20.5 g, 49.9 mmol) in THF (100 mL) was added 1,3-dibromo-5,5-dimethylhydantoin (DBH) (7.15 g, 25.0 mmol, Wako) at 0°C and the reaction mixture was stirred at that temperature overnight. After evaporation, the residue was dissolved in CHCl<sub>3</sub> and the solution was washed with sat. Na<sub>2</sub>S<sub>2</sub>O<sub>3</sub> aq., dried over Na<sub>2</sub>SO<sub>4</sub>, filtered, and concentrated *in vacuo*. The crude product was purified by SiO<sub>2</sub> chromatography with *n*-hexane/Et<sub>2</sub>O (1/1, v/v) to obtain pure **3merBr** (10.2 g, 20.8 mmol, 41.6% yield) as a slightly yellow solid and crude **3merBr2**. The crude **3merBr2** was purified by SiO<sub>2</sub> chromatography with CH<sub>2</sub>Cl<sub>2</sub> and by subsequent washing with Et<sub>2</sub>O to obtain **3merBr2** (5.95 g, 10.5 mmol, 20.9% yield) as a white solid.

**3merBr**. Mp: 147–148°C. IR (KBr, cm<sup>-1</sup>): 2945, 1600, 1492, 1457, 1359, 1204, 1028, 930, 813. <sup>1</sup>H NMR (CDCl<sub>3</sub>): δ 3.76 (s, OMe, 3H), 3.79 (s, OMe, 3H), 3.82 (s, OMe, 3H), 3.83 (s, OMe, 6H), 3.93 (s, OMe, 3H), 6.53 (dd, Ar-H<sub>5''</sub>, *J* = 8.0, 2.5 Hz, 1H), 6.54 (d, Ar-H<sub>3''</sub>, *J* = 2.5 Hz, 1H), 6.56 (s, Ar-H<sub>3</sub>, 1H), 6.61 (s, Ar-H<sub>5'</sub>, 1H), 7.09 (s, Ar-H<sub>2'</sub>, 1H), 7.18 (d, Ar-H<sub>6''</sub>, *J* = 8.0 Hz, 1H), 7.43 (s, Ar-H<sub>6</sub>, 1H). <sup>13</sup>C NMR (CDCl<sub>3</sub>): δ 55.32, 55.65, 55.85, 55.86, 56.09, 56.36, 95.91, 97.09, 98.89, 101.67, 104.17, 117.82, 119.35, 119.99, 121.39, 132.06, 134.37, 135.39, 155.62, 156.99, 157.48, 158.09, 160.04. HRMS (ESI<sup>+</sup>): *m/z* calcd for C<sub>24</sub>H<sub>25</sub>BrNaO<sub>6</sub> (M+Na<sup>+</sup>), 511.07322; found, 511.07221.

**3merBr2**. Mp: 204–205°C. IR (KBr, cm<sup>-1</sup>): 2937, 1598, 1492, 1464, 1375, 1301, 1204, 1032, 935, 816. <sup>1</sup>H NMR (CDCl<sub>3</sub>): δ 3.79 (s, OMe, 6H), 3.83 (s, OMe, 6H), 3.93 (s, OMe, 6H), 6.56 (s Ar-H<sub>3</sub> and 3'', 2H), 6.60 (s, Ar-H<sub>5'</sub>, 1H), 7.06 (s, Ar-H<sub>2'</sub>, 1H), 7.42 (s, Ar-H<sub>6</sub> and 6'', 2H). <sup>13</sup>C NMR (CDCl<sub>3</sub>): δ 55.87, 56.10, 56.38, 95.79, 97.09,

101.70, 118.00, 121.18, 134.20, 135.33, 155.71, 157.36, 157.49. HRMS (ESI+):  $m/z$  calcd for  $C_{24}H_{24}Br_2NaO_6$  ( $M+Na^+$ ), 588.98373; found, 588.98923

**3merBP [3-(4,4,5,5-Tetramethyl-1,3,2-dioxaborolyl)- 4,6,4',6',2'',4''-hexamethoxy-1,1':3',1''-terphenyl]<sup>5</sup>**

To a solution of **3merBr** (12 g, 24.5 mmol) and  $PdCl_2(PPh_3)_2$  (1.72g, 2.45 mmol, Aldrich) in dehydrated 1,4-dioxane (100 mL) were added distilled  $NEt_3$  (10.2 mL, 73.4 mmol) and pinacolborane (5.3 mL, 36.4 mmol, Aldrich) under Ar, and subsequently the mixture was heated at 80°C overnight. After concentration, the black residue was extracted with  $Et_2O$  (*ca.* 200 mL). The  $Et_2O$ -insoluble black precipitate was removed with Celite filtration. After concentration of the filtrate, the crude product was purified by  $SiO_2$  chromatography with *n*-hexane/ $Et_2O$  (2/1 to 3/2, v/v) and by further recrystallization from  $Et_2O$  to obtain **3merBP** as a slightly gray powder (8.65 g, 16.1 mmol, 79.0% yield). Mp: 175–176°C. IR (KBr,  $cm^{-1}$ ): 2975, 2937, 1602, 1571, 1493, 1460, 1333, 1205, 1033, 938, 833.  $^1H$  NMR ( $CDCl_3$ ):  $\delta$  1.30 (s, Me, 12H), 3.76 (s, OMe, 3H), 3.81 (2 x s, OMe, 2 x 3H), 3.82 (s, OMe, 3H), 3.83 (s, OMe, 3H), 3.88 (s, OMe, 3H), 6.49 (s, Ar- $H_5$ , 1H), 6.52 (dd, Ar- $H_5''$ ,  $J = 8.0, 2.5$  Hz, 1H), 6.54 (d, Ar- $H_3''$ ,  $J = 2.5$  Hz, 1H), 6.60 (s, Ar- $H_5'$ , 1H), 7.11 (s, Ar- $H_2'$ , 1H), 7.19 (d, Ar- $H_6''$ ,  $J = 8.0$  Hz, 1H), 7.60 (s, Ar- $H_2$ , 1H).  $^{13}C$  NMR ( $CDCl_3$ ):  $\delta$  24.79, 55.31, 55.59, 55.92, 56.26, 82.97, 95.24, 96.05, 98.88, 104.11, 119.26, 119.49, 119.75, 120.29, 132.09, 134.41, 140.20, 157.16, 157.22, 158.10, 159.94, 160.93, 165.53.

**5merMe****[2,4,4',6',4'',6'',4''',6''',2''',4''''-Decamethoxy-****1,1':3',1'':3'',1''':3''',1''''-quinquephenyl]<sup>6</sup>**

A solution of **1merB** (362 mg, 2.00 mmol), **3merBr<sub>2</sub>** (568 mg, 1.00 mmol), and Pd(PPh<sub>3</sub>)<sub>4</sub> (115 mg, 0.10 mmol) in dehydrated THF (14 mL) was purged with Ar. An aqueous solution of K<sub>2</sub>CO<sub>3</sub> (2 M, 4 mL, 8 mmol) purged with Ar was added to the solution by a syringe. The mixture was refluxed for 4 days and was then evaporated to dryness. The residue was partitioned between CHCl<sub>3</sub> (40 mL) and 10% aq. NaOH (10 mL). The CHCl<sub>3</sub> layer was separated, washed with H<sub>2</sub>O (10 mL) and successively with brine (10 mL), and dried over MgSO<sub>4</sub>. After filtration, the solvent was evaporated, and the residue was purified by column chromatography (SiO<sub>2</sub>, 40 g, *n*-hexane/CHCl<sub>3</sub> = 1/1 to 0/1, v/v) and by preparative HPLC (CHCl<sub>3</sub>) to afford **5merMe** as a yellow solid in 48% yield. Mp: 117–119°C. IR (KBr, cm<sup>-1</sup>): 2995, 2936, 1604, 1491, 1204, 1161, 1034, 930, 822. <sup>1</sup>H NMR (CDCl<sub>3</sub>): δ 3.74 (s, OMe, 6H), 3.80 (s, OMe, 6H), 3.82 (s, OMe, 12H), 3.83 (s, OMe, 6H), 6.51 (dd, *J* = 8.0, 2.5 Hz, Ar-H<sub>5</sub> and 5''', 2H), 6.52 (d, *J* = 2.5 Hz, Ar-H<sub>3</sub> and 3''', 2H), 6.60 (s, Ar-H<sub>5'</sub> and 5'', 2H), 6.61 (s, Ar-H<sub>5''</sub>, 1H), 7.15 (s, Ar-H<sub>2'</sub> and 2''', 2H), 7.16 (d, *J* = 8.0 Hz, Ar-H<sub>6</sub> and 6''', 2H), 7.22 (s, Ar-H<sub>2''</sub>, 1H). <sup>13</sup>C NMR (CDCl<sub>3</sub>): δ 55.28, 55.62, 55.82, 55.83, 95.97, 98.82, 104.09, 119.13, 119.20, 119.25, 120.27, 132.12, 134.73, 134.88, 157.01, 157.04, 157.10, 158.08, 159.88. ESI-MS (CH<sub>2</sub>Cl<sub>2</sub>/CH<sub>3</sub>OH (1/1, v/v), positive): Calcd for C<sub>40</sub>H<sub>42</sub>O<sub>10</sub>Na [**5merMe**+Na]<sup>+</sup>: *m/z* = 705.27. Found: *m/z* = 705.34. Anal. Calcd for C<sub>40</sub>H<sub>42</sub>O<sub>10</sub>·(CHCl<sub>3</sub>)<sub>0.7</sub>: C, 63.79; H, 5.62. Found: C, 64.37; H, 5.67.

**6merMe [2,4,4',6',4'',6'',4''',6''',4''''',6''''',2''''',4'''''-Dodecamethoxy-1,1':3',1'':3'',1''':3''',1''''':3''''',1''''''-sexiphenyl]<sup>6</sup>**

A solution of **3merBP** (1.41 g, 2.62 mmol), **3merBr** (1.28 g, 2.62 mmol), and Pd(PPh<sub>3</sub>)<sub>4</sub> (152 mg, 0.132 mmol) in dehydrated THF (24 mL) was purged with Ar. An aqueous solution of K<sub>2</sub>CO<sub>3</sub> (2 M, 4 mL, 8 mmol) purged with Ar was added to the solution by a syringe and the mixture was refluxed for 2 days. After most of the solvent had been removed by evaporation, the aqueous solution was extracted with CHCl<sub>3</sub>. The organic layer was dried over Na<sub>2</sub>SO<sub>4</sub>, filtered, and concentrated *in vacuo*. The crude product was purified by NH<sub>2</sub>-SiO<sub>2</sub> chromatography with *n*-hexane/CH<sub>2</sub>Cl<sub>2</sub> (2/1 to 1/1, v/v) and then by recycling preparative SEC with CHCl<sub>3</sub> as the eluent to obtain **6merMe** as a white powder (1.38 g, 1.69 mmol, 64.3% yield). Mp: 138–140°C. IR (KBr, cm<sup>-1</sup>): 2935, 1604, 1490, 1203, 1165, 1034, 930, 821. <sup>1</sup>H NMR (CDCl<sub>3</sub>): δ 3.73 (s, OMe, 6H), 3.80 (s, OMe, 6H), 3.81 (s, OMe, 12H), 3.82 (s, OMe, 12H), 6.51 (dd, *J* = 8.0, 2.5 Hz, Ar-H<sub>5</sub> and 5''''', 2H), 6.52 (d, *J* = 2.5 Hz, Ar-H<sub>3</sub> and 3''''', 2H), 6.60 (s, Ar-H<sub>5'</sub>, 5'', 5''', and 5''''', 4H), 7.15 (s, Ar-H<sub>5'</sub> and 5''''', 2H), 7.17 (d, *J* = 8.0 Hz, Ar-H<sub>6</sub> and 6''''', 2H), 7.21 (s, Ar-H<sub>2''</sub> and 2''''', 2H). <sup>13</sup>C NMR (CDCl<sub>3</sub>): δ 55.29, 55.63, 55.82, 55.84, 95.99, 98.84, 104.09, 119.10, 119.17, 119.22, 119.31, 120.31, 132.14, 134.78, 134.95, 156.98, 157.00, 157.03, 157.12, 158.10, 159.86. ESI-MS (CH<sub>2</sub>Cl<sub>2</sub>/CH<sub>3</sub>OH (1/1, v/v), positive): Calcd for C<sub>48</sub>H<sub>50</sub>O<sub>12</sub>Na [**6merMe**+Na]<sup>+</sup>: *m/z* = 841.32. Found: *m/z* = 841.40. Anal. Calcd for C<sub>48</sub>H<sub>50</sub>O<sub>12</sub>: C, 70.40; H, 6.15. Found: C, 70.48; H, 6.13.

**9merMe**



C, 70.46; H, 6.08. Found: C, 70.40; H, 6.07.

### **3merH [2,4,4',6',2'',4''-Hexahydroxy-1,1':3',1''-terphenyl]**

To a solution of **3merMe** (410 mg, 1.00 mmol) in dehydrated CH<sub>2</sub>Cl<sub>2</sub> (100 mL) was dropwise added BBr<sub>3</sub> (1 M in CH<sub>2</sub>Cl<sub>2</sub>, 20 mL, 20 mmol) at -78°C over 10 min, and the mixture was then stirred overnight at -78°C. After water (10 mL) was slowly added to the solution at that temperature to quench any excess BBr<sub>3</sub>, the solution was slowly warmed to room temperature. After concentration, the resulting mixture was found to contain a considerable amount of HBr and water, which were repeatedly removed by evaporation as an azeotropic mixture with EtOH (20 mL) until the water was completely removed. The CH<sub>3</sub>CN (*ca.* 10 mL)-insoluble part was removed by filtration and the filtrate was concentrated *in vacuo*. The EtOH (*ca.* 10 mL)-insoluble part was then removed by filtration, and the filtrate was concentrated *in vacuo*. The residue was dissolved in water (*ca.* 10 mL) and dialyzed using a Spectra/Por membrane (MW = 100). The resulting aqueous solution was filtered by membrane filtration and the filtrate was lyophilized to obtain **3merH** as a slightly gray powder (314 mg, 0.931 mmol, 93.1% yield). Mp: 145–148°C. IR (KBr, cm<sup>-1</sup>): 3389 (ν<sub>O-H</sub>), 1617, 1496, 1415, 1285, 1163, 971, 843. <sup>1</sup>H NMR (CD<sub>3</sub>CN): δ 6.41 (d, *J* = 2.5 Hz, Ar-H<sub>3</sub> and 3'', 2H), 6.42 (dd, *J* = 8.0, 2.5 Hz, Ar-H<sub>5</sub> and 5'', 2H), 6.53 (s, Ar-H<sub>5'</sub>, 1H), 6.97 (s, Ar-H<sub>2'</sub>, 1H), 7.05 (d, *J* = 8.0 Hz, Ar-H<sub>6</sub> and 6'', 2H), 6.0–8.0 (br, OH, 6H). <sup>1</sup>H NMR (CD<sub>3</sub>OD): δ 7.12 (d, *J* = 2.5 Hz, Ar-H<sub>3</sub> and 3'', 2H, and dd, *J* = 9.0, 2.5 Hz, Ar-H<sub>5</sub> and 5'', 2H), 7.24 (s, Ar-H<sub>5'</sub>, 1H), 7.73 (s, Ar-H<sub>2'</sub>, 1H), 7.77 (d, *J* = 9.0 Hz, Ar-H<sub>6</sub> and 6'', 2H).

$^{13}\text{C}$  NMR ( $\text{CD}_3\text{CN}$ ):  $\delta$  104.00, 104.79, 108.93, 117.97, 119.27, 133.32, 135.07, 155.00, 155.58, 158.59. ESI-MS ( $\text{CH}_3\text{OH}$ , negative): Calcd for  $\text{C}_{18}\text{H}_{13}\text{O}_6$  [**3merH**-H] $^-$ :  $m/z$  = 325.07. Found:  $m/z$  = 325.11. Anal. Calcd for  $\text{C}_{18}\text{H}_{14}\text{O}_6 \cdot 4.3\text{H}_2\text{O}$ : C, 61.63; H, 4.46. Found: C, 61.64; H, 4.51.

**5merH** [2,4,4',6',4'',6'',4''',6''',2''',4''''-Decahydroxy-1,1':3',1'':3'',1''':3''',1''''-quinquephenyl]

To a solution of **5merMe** (250 mg, 0.366 mmol) in dehydrated  $\text{CH}_2\text{Cl}_2$  (30 mL) was dropwise added  $\text{BBR}_3$  (1 M in  $\text{CH}_2\text{Cl}_2$ , 10 mL, 10 mmol) at  $0^\circ\text{C}$  under Ar, and the mixture was then stirred overnight at that temperature. After water (1 mL) was slowly added at  $0^\circ\text{C}$ , the solution was slowly warmed to room temperature. After concentration, the resulting mixture was found to contain a considerable amount of HBr and water, which were repeatedly removed by evaporation as an azeotropic mixture with EtOH (20 mL) until the water was completely removed. The  $\text{CH}_3\text{CN}$  (*ca.* 10 mL)-insoluble part was removed by filtration and the filtrate was concentrated *in vacuo*. The EtOH (*ca.* 10 mL)-insoluble part was then removed by filtration, and the filtrate was concentrated *in vacuo*. The residue was dissolved in water (*ca.* 10 mL) and dialyzed using a Spectra/Por membrane (MW = 100). The resulting aqueous solution was filtered by membrane filtration and the filtrate was lyophilized to obtain **5merH** as a slightly brown powder (195 mg, 0.359 mmol, 98.2% yield). Mp:  $210^\circ\text{C}$  (dec). IR (KBr,  $\text{cm}^{-1}$ ): 3366 ( $\nu_{\text{O-H}}$ ), 1615, 1497, 1408, 1284, 1165, 972, 840.  $^1\text{H}$  NMR ( $\text{CD}_3\text{CN}$ ):  $\delta$  6.41 (d,  $J$  = 2.5 Hz, Ar- $\text{H}_3$  and 3''', 2H), 6.42 (dd,  $J$  = 8.0, 2.5 Hz, Ar- $\text{H}_5$  and 5''', 2H),

6.55 (s, Ar-H<sub>5'</sub> and 5''', 2H), 6.57 (s, Ar-H<sub>5''</sub>, 1H), 7.04 (s, Ar-H<sub>2''</sub>, 1H), 7.05 (d,  $J = 8.0$  Hz, Ar-H<sub>6</sub> and 6''', 2H), 7.10 (s, Ar-H<sub>2'</sub> and 2''', 2H), 6.0–8.0 (m OH, 10H). <sup>13</sup>C NMR (CD<sub>3</sub>CN):  $\delta$  104.00, 104.81, 104.83, 108.95, 117.92, 119.02, 119.09, 119.31, 133.36, 135.18, 135.23, 155.00, 155.07, 155.10, 155.54, 158.58. ESI-MS (CH<sub>3</sub>OH, negative): Calcd for C<sub>30</sub>H<sub>21</sub>O<sub>10</sub> [**6merH**-H]<sup>-</sup>:  $m/z = 541.11$ . Found:  $m/z = 541.18$ . ESI-MS: [**5merH**-H]<sup>-</sup> = C<sub>30</sub>H<sub>21</sub>O<sub>10</sub>, Exact Mass = 541.18,  $m/z = 541.11$ . Anal. Calcd for C<sub>30</sub>H<sub>22</sub>O<sub>10</sub>·2.8H<sub>2</sub>O: C, 60.77; H, 4.69. Found: C, 60.61; H, 4.29.

**6merH** [2,4,4',6',4'',6'',4''',6''',4''',6''',2''',4''''-Dodecahydroxy-1,1':3',1'':3'',1''':3''',1''':3''',1''''-sexiphenyl]

To a solution of **6merMe** (110 mg, 0.134 mmol) in dehydrated CH<sub>2</sub>Cl<sub>2</sub> (20 mL) was dropwise added BBr<sub>3</sub> (1 M in CH<sub>2</sub>Cl<sub>2</sub>, 5 mL, 5 mmol) at 0°C under Ar, and the mixture was then stirred overnight at that temperature. After water (2 mL) was slowly added at 0°C, the solution was slowly warmed to room temperature. After concentration, the resulting mixture was found to contain a considerable amount of HBr and water, which were repeatedly removed by evaporation as an azeotropic mixture with EtOH (20 mL) until the water was completely removed. The CH<sub>3</sub>CN (*ca.* 10 mL)-insoluble part was removed by filtration and the filtrate was concentrated *in vacuo*. The EtOH (*ca.* 10 mL)-insoluble part was then removed by filtration, and the filtrate was concentrated *in vacuo*. The residue was dissolved in water (*ca.* 10 mL) and dialyzed using a Spectra/Por membrane (MW = 100). The resulting aqueous solution was filtered by membrane filtration and the filtrate was lyophilized to obtain **6merH** as



considerable amount of HBr and water, which were repeatedly removed by evaporation as an azeotropic mixture with EtOH (20 mL) until the water was completely removed. The CH<sub>3</sub>CN (*ca.* 10 mL)-insoluble part was removed by filtration and the filtrate was concentrated *in vacuo*. The EtOH (*ca.* 10 mL)-insoluble part was then removed by filtration, and the filtrate was concentrated *in vacuo*. The residue was dissolved in water (*ca.* 10 mL) and dialyzed using a Spectra/Por membrane (MW = 500). The resulting aqueous solution was filtered by membrane filtration and the filtrate was lyophilized to obtain **9merH** as a slightly brown powder (610 mg, 0.579 mmol, 88.8% yield). Mp: 300°C (dec). IR (KBr, cm<sup>-1</sup>): 3399 ( $\nu_{\text{O-H}}$ ), 1616, 1492, 1405, 1279, 1161, 976, 841. <sup>1</sup>H NMR (CD<sub>3</sub>CN):  $\delta$  6.38 (dd,  $J$  = 8.0, 2.5 Hz, Ar-H<sub>5</sub> and 5''''''''', 2H), 6.40 (d,  $J$  = 2.5 Hz, Ar-H<sub>3</sub> and 3''''''''', 2H), 6.54 (2 x s, Ar, 2H and 3H), 6.55 (s, Ar, 2H), 6.99 (s, Ar, 2H), 7.00 (d,  $J$  = 8.0 Hz, Ar-H<sub>6</sub> and 6''''''''', 2H), 7.05 (s, Ar, 2H), 7.06 (s, Ar, 3H), 6.0–8.0 (br, OH, 18H). <sup>1</sup>H NMR (CD<sub>3</sub>OD):  $\delta$  7.10 (d,  $J$  = 2.5 Hz, Ar-H<sub>3</sub> and 3''''''''', 2H, and dd,  $J$  = 9.0, 2.5 Hz, Ar-H<sub>5</sub> and 5''''''''', 2H), 7.23 (s, Ar, 2H), 7.24 (2 x s, Ar, 3H and 2H), 7.76 (d,  $J$  = 9.0 Hz, Ar-H<sub>6</sub> and 6''''''''', 2H), 7.77 (s, Ar, 2H), 7.83 (2 x s, Ar, 2H and 3H). <sup>13</sup>C NMR (CD<sub>3</sub>CN):  $\delta$  104.02, 104.75, 104.78, 104.81, 104.83, 108.98, 117.92, 118.86, 118.88, 118.90, 118.97, 118.99, 119.27, 133.33, 135.13, 135.19, 135.22, 135.24, 154.96, 155.00, 155.07, 155.10, 155.11, 155.14, 155.47, 158.51. ESI-MS (CH<sub>3</sub>OH, negative): Calcd for C<sub>54</sub>H<sub>37</sub>O<sub>18</sub> [**9merH**–H]<sup>–</sup>:  $m/z$  = 973.20. Found:  $m/z$  = 973.24. Anal. Calcd for C<sub>54</sub>H<sub>38</sub>O<sub>18</sub>·4.4H<sub>2</sub>O: C, 64.13; H, 4.54. Found: C, 64.03; H, 4.52.

### 3-2. Synthesis of Chiral Oligoresorcinols

Chiral oligoresorcinols were synthesized according to Scheme S-2. The reaction progresses were monitored by TLC or ESI-MS.

**Scheme S-2. Synthesis of Chiral Oligomers<sup>a</sup>**

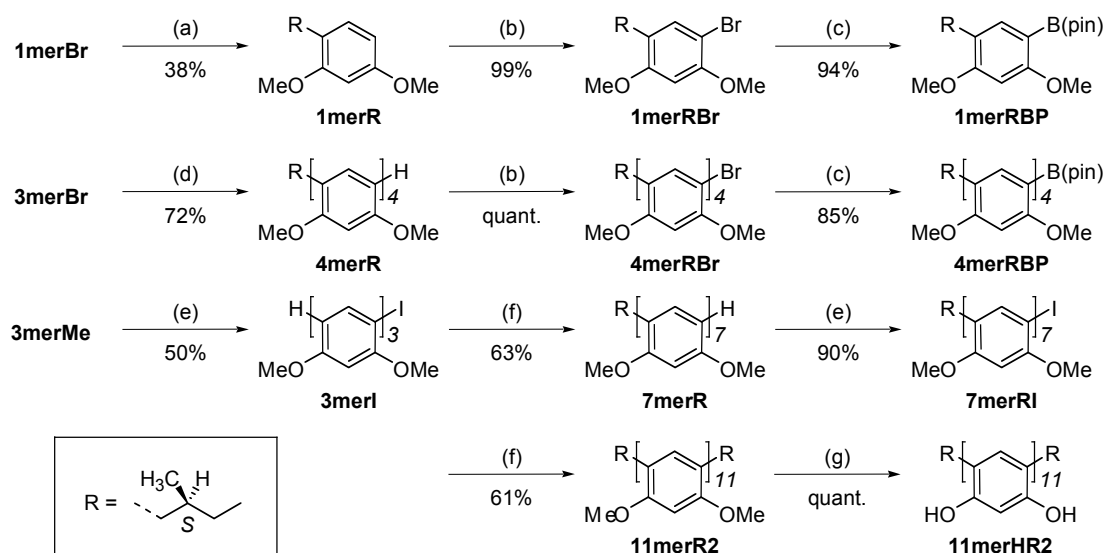

<sup>a</sup> Reagents and conditions: (a) (1) *t*-BuLi, THF,  $-78^{\circ}\text{C}$ , 25 min, (2)  $\text{MgBr}_2 \cdot \text{Et}_2\text{O}$ ,  $-78^{\circ}\text{C}$ , 30 min, (3) (*S*)-1-bromo-2-methyl-butane,  $\text{CuCl}_2$ , reflux, 2 days; (b) DBH,  $0^{\circ}\text{C}$ , 1 day; (c) pinacolborane,  $\text{PdCl}_2(\text{PPh}_3)_2$ ,  $\text{NEt}_3$ , 1,4-dioxane,  $80^{\circ}\text{C}$ , 1 day; (d) **1merRBP**,  $\text{Pd}(\text{PPh}_3)_4$ ,  $\text{K}_2\text{CO}_3$ , toluene,  $\text{H}_2\text{O}$ ,  $80^{\circ}\text{C}$ , 2 days; (e) DIH,  $0^{\circ}\text{C}$ , 1 day; (f) **4merRBP**,  $\text{Pd}(\text{PPh}_3)_4$ ,  $\text{K}_2\text{CO}_3$ , toluene,  $\text{H}_2\text{O}$ ,  $80^{\circ}\text{C}$ , 2 days; (g)  $\text{BBr}_3$ ,  $0^{\circ}\text{C}$ , 4 days.

**1merR** [4-((*S*)-2-Methylbutyl)-1,3-dimethoxybenzene]<sup>7</sup>

To a solution of **1merBr** (9.7 g, 44.7 mmol) in dehydrated THF (90 mL) was slowly added *t*-BuLi (1.45 M in *n*-pentane, 61 mL, 88.5 mmol, Kanto Chemical) over 15 min at  $-78^{\circ}\text{C}$  under Ar, and then the solution was further stirred for 10 min at room temperature. The solution was again cooled to  $-78^{\circ}\text{C}$  and  $\text{MgBr}_2\cdot\text{Et}_2\text{O}$  (12.7 g, 49.2 mmol, Aldrich) was then added at one time. After being stirred at room temperature for 30 min, the resulting suspension became an almost clear yellow solution. (*S*)-1-Bromo-2-methylbutane (8.1 g, 53.6 mmol, Aldrich) and copper(II) chloride (180 mg, 1.34 mmol, Aldrich) were subsequently added to the solution at  $-78^{\circ}\text{C}$ . The solution was stirred at room temperature for 30 min and then refluxed for 2 days. After evaporation, the residue was dissolved in *n*-hexane and the solution was washed with brine. The organic layer was washed with an aqueous EDTA solution, dried over  $\text{Na}_2\text{SO}_4$ , and filtered. After concentrated *in vacuo*, the crude product was purified by short  $\text{NH}_2\text{-SiO}_2$  chromatography ( $\text{CH}_2\text{Cl}_2$ ) and then by subsequent  $\text{SiO}_2$  chromatography (*n*-hexane) to obtain **1merR** as a colorless oil (3.53 g, 16.9 mmol, 37.9% yield). IR (neat,  $\text{cm}^{-1}$ ): 2998, 2958, 1613, 1506, 1464, 1288, 1208, 1156, 1040, 927, 834.  $^1\text{H}$  NMR ( $\text{CDCl}_3$ ):  $\delta$  0.82 (d,  $\text{CHCH}_3$ ,  $J = 7.0$  Hz, 3H), 0.89 (t,  $\text{CH}_2\text{CH}_3$ ,  $J = 7.5$  Hz, 3H), 1.14 (m,  $\text{CHCH}_3$ , 1H), 1.38 (m,  $\text{CHCH}_3$ , 1H), 1.62 (m, CH, 1H), 2.29 (dd,  $\text{CH}_2$ ,  $J = 13.5, 8.0$  Hz, 1H), 2.55 (dd,  $\text{CH}_2$ ,  $J = 13.5, 6.0$  Hz, 1H), 3.78 (s, OMe, 3H), 3.79 (s, OMe, 3H), 6.41 (dd, Ar- $\text{H}_6$ ,  $J = 8.0, 2.5$  Hz, 1H), 6.44 (d, Ar- $\text{H}_2$ ,  $J = 2.5$  Hz, 1H), 6.98 (d, Ar- $\text{H}_5$ ,  $J = 8.0$  Hz, 1H).  $^{13}\text{C}$  NMR ( $\text{CDCl}_3$ ):  $\delta$  11.51, 19.01, 29.35, 35.20, 36.77, 55.25, 55.30, 98.41, 103.55, 122.62, 130.91, 158.54, 158.92.

**1merRBr [4-Bromo-6-((S)-2-methylbutyl)-1,3-dimethoxybenzene]**

To a solution of **1merR** (3.48 g, 16.7 mmol) in THF (50 mL) was added DBH (2.50 g, 8.74 mmol) at 0°C and the mixture was stirred overnight at that temperature. After evaporation, the residue was dissolved in *n*-hexane and the solution was washed with sat. Na<sub>2</sub>S<sub>2</sub>O<sub>3</sub> aq., dried over Na<sub>2</sub>SO<sub>4</sub>, filtered, and concentrated *in vacuo*. The crude product was purified by short SiO<sub>2</sub> chromatography with *n*-hexane/ethyl acetate (4/1, v/v) to give **1merRBr** as a colorless oil (4.75 g, 16.5 mmol, 99.0% yield). IR (neat, cm<sup>-1</sup>): 3001, 2958, 1602, 1503, 1463, 1289, 1204, 1161, 1036, 891, 813. <sup>1</sup>H NMR (CDCl<sub>3</sub>): δ 0.82 (d, CHCH<sub>3</sub>, *J* = 7.0 Hz, 3H), 0.89 (t, CH<sub>2</sub>CH<sub>3</sub>, *J* = 7.5 Hz, 3H), 1.14 (m, CHCH<sub>3</sub>, 1H), 1.36 (m, CHCH<sub>3</sub>, 1H), 1.60 (m, CH, 1H), 2.27 (dd, CH<sub>2</sub>, *J* = 13.5, 8.0 Hz, 1H), 2.53 (dd, CH<sub>2</sub>, *J* = 13.5, 6.0 Hz, 1H), 3.81 (s, OMe, 3H), 3.89 (s, OMe, 3H), 6.45 (s, Ar-H<sub>2</sub>, 1H), 7.21 (s, Ar-H<sub>5</sub>, 1H). <sup>13</sup>C NMR (CDCl<sub>3</sub>): δ 11.48, 18.92, 29.29, 35.21, 36.38, 55.63, 56.41, 96.67, 101.22, 124.08, 134.25, 154.58, 157.83.

**1merRBP [5-((S)-2-Methylbutyl)-1-(4,4,5,5-tetramethyl-1,3,2-dioxaborolyl)-2,4-dimethoxybenzene]**

To a solution of **1merRBr** (4.70 g, 16.3 mmol) and PdCl<sub>2</sub>(PPh<sub>3</sub>)<sub>2</sub> (564 mg, 0.804 mmol) in dehydrated 1,4-dioxane (50 mL) were added distilled NEt<sub>3</sub> (6.9 mL, 49.2 mmol) and pinacolborane (3.5 mL, 24.6 mmol) under Ar, and subsequently the mixture was heated at 80°C overnight. After concentration, the black residue was extracted with Et<sub>2</sub>O (*ca.* 100 mL). The Et<sub>2</sub>O-insoluble black precipitate was removed with Celite filtration. After concentration of the filtrate, the crude product was purified by

SiO<sub>2</sub> chromatography with *n*-hexane/Et<sub>2</sub>O (2/1, v/v) to obtain **1merRBP** as a white solid (5.13 g, 15.4 mmol, 93.6% yield). Mp: 53–54°C. IR (KBr, cm<sup>-1</sup>): 3367, 2999, 2956, 1609, 1507, 1468, 1413, 1334, 1260, 1209, 1146, 1035, 864, 815. <sup>1</sup>H NMR (CDCl<sub>3</sub>): δ 0.81 (d, CHCH<sub>3</sub>, *J* = 6.5 Hz, 3H), 0.89 (t, CH<sub>2</sub>CH<sub>3</sub>, *J* = 7.5 Hz, 3H), 1.14 (m, CHCH<sub>3</sub>, 1H), 1.33 (s, Me, 12H), 1.37 (m, CHCH<sub>3</sub>, 1H), 1.63 (m, CH, 1H), 2.30 (dd, CH<sub>2</sub>, *J* = 13.5, 8.0 Hz, 1H), 2.54 (dd, CH<sub>2</sub>, *J* = 13.5, 6.0 Hz, 1H), 3.82 (s, OMe, 3H), 3.83 (s, OMe, 3H), 6.38 (s, Ar-H<sub>3</sub>, 1H), 7.39 (s, Ar-H<sub>6</sub>, 1H). <sup>13</sup>C NMR (CDCl<sub>3</sub>): δ 11.54, 18.96, 24.81, 29.43, 35.38, 36.55, 55.15, 56.37, 82.98, 94.95, 121.92, 138.91, 161.32, 164.62.

**4merR**                      **[5-((*S*)-2-Methylbutyl)-2,4,4',6',4'',6'',2''',4'''-octamethoxy-1,1':3',1'':3'',1'''-quarterphenyl]**

To a solution of **3merBr** (2.45 g, 5.0 mmol), **1merRBP** (1.67 g, 5.0 mmol), and Pd(PPh<sub>3</sub>)<sub>4</sub> (289 mg, 0.25 mmol) in dehydrated toluene (30 mL) was added a degassed K<sub>2</sub>CO<sub>3</sub> aqueous solution (2 M, 7.5 mL, 15 mmol) under Ar and the mixture was heated at 80°C for 2 days. After most of the solvent had been removed by evaporation, the aqueous solution was extracted with ethyl acetate. The organic layer was dried over Na<sub>2</sub>SO<sub>4</sub>, filtered, and concentrated *in vacuo*. The crude product was purified by NH<sub>2</sub>-SiO<sub>2</sub> chromatography with CH<sub>2</sub>Cl<sub>2</sub> and subsequent by SiO<sub>2</sub> chromatography with THF/*n*-hexane (1/3 to 1/0, v/v) to obtain a mixture of **3merBr** and **4merR**. *n*-BuLi (1.6 M in *n*-hexane, 10 mL, 160 mmol) was slowly added to a solution of the mixture (**3merBr** and **4merR**) in THF (20 mL) over 10 min at -78°C and the mixture was

stirred at that temperature for 1 h. After methanol (10 mL) was slowly added to the mixture over 5 min at  $-78^{\circ}\text{C}$ , the solution was warmed to room temperature. After evaporation, the residue was dissolved in ethyl acetate and the solution was washed with water. The organic layer was dried over  $\text{Na}_2\text{SO}_4$ , filtered, and concentrated *in vacuo*. The crude product was purified by  $\text{SiO}_2$  chromatography with THF/*n*-hexane (1/3 to 1/0, v/v) and subsequently by  $\text{NH}_2\text{-SiO}_2$  chromatography with  $\text{CH}_2\text{Cl}_2$ /ethyl acetate (1/1, v/v) to obtain **4merR** as a white solid (2.21 g, 3.58 mmol, 71.6% yield). Mp:  $173\text{--}175^{\circ}\text{C}$ . IR (KBr,  $\text{cm}^{-1}$ ): 2995, 2954, 1605, 1492, 1462, 1300, 1203, 1158, 1032, 931, 815.  $^1\text{H}$  NMR ( $\text{CDCl}_3$ ):  $\delta$  0.84 (d,  $\text{CHCH}_3$ ,  $J = 6.5$  Hz, 3H), 0.88 (t,  $\text{CH}_2\text{CH}_3$ ,  $J = 7.5$  Hz, 3H), 1.14 (m,  $\text{CHCH}_3$ , 1H), 1.40 (m,  $\text{CHCH}_3$ , 1H), 1.63 (m, CH, 1H), 2.30 (dd,  $\text{CH}_2$ ,  $J = 13.5, 8.0$  Hz, 1H), 2.55 (dd,  $\text{CH}_2$ ,  $J = 13.5, 6.0$  Hz, 1H), 3.75 (s, OMe, 3H), 3.77 (s, OMe, 3H), 3.81 (2 x s, OMe, 2 x 3H), 3.82 (s, OMe, 3H), 3.83 (s, OMe, 3H), 3.77 (s, OMe, 3H), 3.81 (2 x s, OMe, 2 x 3H), 3.82 (s, OMe, 3H), 3.83 (s, OMe, 3H), 3.84 (s, OMe, 3H), 6.50 (s, Ar, 1H), 6.52 (dd,  $J = 8.0, 2.5$  Hz, Ar- $\text{H}_{5''}$ , 1H), 6.53 (d, Ar- $\text{H}_{3''}$ ,  $J = 2.5$  Hz, 1H), 6.62 (2 x s, Ar, 2 x 1H), 6.98 (s, Ar, 1H), 7.18 (d,  $J = 8.0$  Hz, Ar- $\text{H}_{6''}$ , 1H, and s, Ar, 1H), 7.19 (s, Ar, 1H).  $^{13}\text{C}$  NMR ( $\text{CDCl}_3$ ):  $\delta$  11.53, 19.15, 29.38, 35.14, 36.69, 55.30, 55.45, 55.64, 55.81, 55.85, 56.00, 95.71, 96.01, 96.10, 98.85, 104.12, 118.87, 119.16, 119.26, 119.33, 119.59, 120.26, 121.63, 132.14, 133.89, 134.74, 134.76, 156.00, 157.04, 157.14, 157.48, 158.10, 159.92. HRMS (ESI+):  $m/z$  calcd for  $\text{C}_{37}\text{H}_{44}\text{NaO}_8$  ( $\text{M}+\text{Na}^+$ ), 639.29339; found, 639.29149.

**4merRBr** [5-Bromo-5'''-((*S*)-2-methylbutyl)-2,4,4',6',4'',6'',2''',4'''-octamethoxy-1,1':3',1'':3'',1'''-quaterphenyl]

To a solution of **4merR** (1.09 g, 1.77 mmol) in THF (20 mL) was added DBH (304 mg, 1.06 mmol) at 0°C and the mixture was stirred overnight at that temperature. After evaporation, the residue was dissolved in CHCl<sub>3</sub> and the solution was washed with sat. Na<sub>2</sub>S<sub>2</sub>O<sub>3</sub> aq., dried over Na<sub>2</sub>SO<sub>4</sub>, filtered, and concentrated *in vacuo*. The crude product was purified by NH<sub>2</sub>-SiO<sub>2</sub> chromatography with CHCl<sub>3</sub>/*n*-hexane (1/2 to 1/1, v/v) to obtain **4merRBr** as a white solid (1.24 g, 1.78 mmol, 100% yield). Mp: 96–99°C. IR (KBr, cm<sup>-1</sup>): 2995, 2955, 1601, 1491, 1462, 1282, 1203, 1168, 1034, 932, 816. <sup>1</sup>H NMR (CDCl<sub>3</sub>): δ 0.84 (d, CHCH<sub>3</sub>, *J* = 6.5 Hz, 3H), 0.88 (t, CH<sub>2</sub>CH<sub>3</sub>, *J* = 7.5 Hz, 3H), 1.14 (m, CHCH<sub>3</sub>, 1H), 1.40 (m, CHCH<sub>3</sub>, 1H), 1.63 (m, CH, 1H), 2.30 (dd, CH<sub>2</sub>, *J* = 13.5, 8.0 Hz, 1H), 2.56 (dd, CH<sub>2</sub>, *J* = 13.5, 6.0 Hz, 1H), 3.77 (s, OMe, 3H), 3.78 (s, OMe, 3H), 3.81 (s, OMe, 3H), 3.82 (s, OMe, 3H), 3.84 (3 x s, OMe, 3 x 3H), 3.92 (s, OMe, 3H), 6.51 (s, Ar, 1H), 6.55 (s, Ar, 1H), 6.61 (s, Ar, 1H), 6.62 (s, Ar, 1H), 6.99 (s, Ar, 1H), 7.15 (s, Ar, 1H), 7.17 (s, Ar, 1H), 7.42 (s, Ar-H<sub>6</sub>, 1H). <sup>13</sup>C NMR (CDCl<sub>3</sub>): δ 11.53, 19.14, 29.38, 35.14, 36.69, 55.45, 55.83, 55.85, 55.87, 56.00, 56.09, 56.36, 95.71, 95.90, 96.13, 97.10, 101.66, 117.80, 118.81, 119.04, 119.50, 119.64, 121.45, 121.64, 133.87, 134.60, 134.66, 135.43, 155.59, 155.99, 156.90, 157.01, 157.13, 157.47, 157.50. HRMS (ESI<sup>+</sup>): *m/z* calcd for C<sub>37</sub>H<sub>43</sub>BrNaO<sub>8</sub> (M+Na<sup>+</sup>), 717.20390; found, 717.19747.

**4merRBP [5'''-((*S*)-2-Methylbutyl)-4,6,4',6',4'',6'',2'',4'''-octamethoxy-3-(4,4,5,5-tetramethyl-1,3,2-dioxaborolyl)-1,1':3',1'':3'',1'''-quaterphenyl]**

To a solution of **4merRBr** (1.21 g, 1.74 mmol) and PdCl<sub>2</sub>(PPh<sub>3</sub>)<sub>2</sub> (61 mg, 0.087 mmol) in dehydrated 1,4-dioxane (20 mL) were added distilled NEt<sub>3</sub> (1.46 mL, 10.4

mmol) and pinacolborane (0.75 mL, 5.21 mmol) under Ar, and subsequently the mixture was heated at 80°C overnight. After concentration, the black residue was extracted with Et<sub>2</sub>O (*ca.* 100 mL). The Et<sub>2</sub>O-insoluble black precipitate was removed with Celite filtration. After concentration of the filtrate, the crude product was purified by SiO<sub>2</sub> chromatography with Et<sub>2</sub>O/*n*-hexane (4/1, v/v) to obtain **4merRBP** as a slightly brown solid (1.10 g, 1.48 mmol, 85.1% yield). Mp: 113–115°C. IR (KBr, cm<sup>-1</sup>): 2992, 2956, 1603, 1493, 1463, 1437, 1334, 1269, 1203, 1168, 1145, 1034, 931, 818. <sup>1</sup>H NMR (CDCl<sub>3</sub>): δ 0.84 (d, CHCH<sub>3</sub>, *J* = 7.0 Hz, 3H), 0.88 (t, CH<sub>2</sub>CH<sub>3</sub>, *J* = 7.5 Hz, 3H), 1.14 (m, CHCH<sub>3</sub>, 1H), 1.30 (s, Me, 12H), 1.40 (m, CHCH<sub>3</sub>, 1H), 1.64 (m, CH, 1H), 2.30 (dd, CH<sub>2</sub>, *J* = 13.5, 8.0 Hz, 1H), 2.55 (dd, CH<sub>2</sub>, *J* = 13.5, 6.0 Hz, 1H), 3.77 (s, OMe, 3H), 3.80 (2 x s, OMe, 2 x 3H), 3.81 (s, OMe, 3H), 3.83 (2 x s, OMe, 6H and 3H), 3.87 (s, OMe, 3H), 6.47 (s, Ar, 1H), 6.50 (s, Ar, 1H), 6.60 (s, Ar, 1H), 6.61 (s, Ar, 1H), 6.99 (s, Ar, 1H), 7.16 (s, Ar, 1H), 7.18 (s, Ar, 1H), 7.60 (s, Ar-H<sub>2</sub>, 1H). <sup>13</sup>C NMR (CDCl<sub>3</sub>): δ 11.53, 19.15, 24.79, 29.38, 35.13, 36.68, 55.45, 55.58, 55.83, 55.88, 55.91, 55.99, 56.23, 82.95, 95.18, 95.68, 96.01, 96.13, 118.85, 119.33, 119.43, 119.54, 119.78, 121.58, 133.90, 134.64, 134.71, 140.30, 155.98, 157.00, 157.01, 157.11, 157.17, 157.45, 160.90, 165.46.

### **3merI [5-Iodo-2,4,4',6',2'',4''-hexamethoxy-1,1':3',1''-terphenyl]**

To a solution of **3merMe** (4.1 g, 10 mmol) in THF (100 mL) was added DIH (5.7 g, 15 mmol) at 0°C and the solution was stirred at that temperature for 1 day. To the solution was added a 20 w% aqueous Na<sub>2</sub>S<sub>2</sub>O<sub>3</sub> solution (50 mL) at 0°C to quench any

excess DIH. After most of the solvent had been removed by evaporation, the aqueous solution was extracted with  $\text{CHCl}_3$ . The organic layer was dried over  $\text{Na}_2\text{SO}_4$ , filtered, and concentrated *in vacuo*. The crude product was purified by  $\text{SiO}_2$  chromatography with THF/*n*-hexane (1/2, v/v) to obtain **3merI** as a slightly brown solid (2.70 g, 5.02 mmol, 50.2% yield). Mp: 83–85°C. IR (KBr,  $\text{cm}^{-1}$ ): 2997, 2936, 1606, 1489, 1463, 1358, 1282, 1205, 1160, 1032, 930, 818.  $^1\text{H}$  NMR ( $\text{CDCl}_3$ ):  $\delta$  3.77 (s, OMe, 3H), 3.80 (s, OMe, 3H), 3.82 (s, OMe, 3H), 3.83 (s, OMe, 6H), 3.91 (s, OMe, 3H), 6.50 (s, Ar- $\text{H}_3$ , 1H), 6.53 (dd, Ar- $\text{H}_{5''}$ ,  $J = 8.0, 2.5$  Hz, 1H), 6.54 (d, Ar- $\text{H}_{3''}$ ,  $J = 2.5$  Hz, 1H), 6.60 (s, Ar- $\text{H}_5$ , 1H), 7.08 (s, Ar- $\text{H}_2$ , 1H), 7.18 (d, Ar- $\text{H}_{6''}$ ,  $J = 8.0$  Hz, 1H), 7.63 (s, Ar- $\text{H}_6$ , 1H).  $^{13}\text{C}$  NMR ( $\text{CDCl}_3$ ):  $\delta$  55.33, 55.65, 55.86, 55.88, 55.96, 56.46, 74.16, 95.94, 96.27, 98.90, 104.18, 117.83, 119.38, 120.01, 122.29, 132.06, 134.33, 141.17, 156.99, 157.49, 158.10, 158.14, 158.67, 160.05. HRMS (ESI+):  $m/z$  calcd for  $\text{C}_{24}\text{H}_{25}\text{INaO}_6$  ( $\text{M}+\text{Na}^+$ ), 559.05935; found, 559.05786.

**7merR** **[5-((*S*)-2-methylbutyl)-**  
**2,4,4',6',4'',6'',4''',6''',4''''',6''''',4''''',6''''',2''''',4''''''-tetradecamethoxy-**  
**1,1':3',1'':3'',1''':3''',1''':3''',1''':3''',1''':3''',1''':3''''-septiphenyl]**

To a solution of **3merI** (320 mg, 0.60 mmol), **4merRBP** (446 mg, 0.60 mmol), and  $\text{Pd}(\text{PPh}_3)_4$  (21 mg, 0.018 mmol) in dehydrated toluene (10 mL) was added a degassed aqueous  $\text{K}_2\text{CO}_3$  solution (2 M, 2 mL, 4 mmol) under Ar and the mixture was heated at 80°C for 2 days. After most of the solvent had been removed by evaporation at room temperature, the aqueous solution was extracted with  $\text{CHCl}_3$ . The organic layer was

dried over Na<sub>2</sub>SO<sub>4</sub>, filtered, and concentrated *in vacuo*. The crude product was purified by SiO<sub>2</sub> chromatography with THF/*n*-hexane (1/1 to 2/1, v/v) and subsequently by NH<sub>2</sub>-SiO<sub>2</sub> chromatography with CH<sub>2</sub>Cl<sub>2</sub>/*n*-hexane (1/3 to 2/1, v/v) to obtain **7merR** as a white solid (387 mg, 0.378 mmol, 62.9% yield). Mp: 143–145°C. IR (KBr, cm<sup>-1</sup>): 2994, 2953, 1604, 1491, 1463, 1282, 1202, 1167, 1034, 931, 818. <sup>1</sup>H NMR (CDCl<sub>3</sub>): δ 0.83 (d, CHCH<sub>3</sub>, *J* = 6.5 Hz, 3H), 0.88 (t, CH<sub>2</sub>CH<sub>3</sub>, *J* = 7.5 Hz, 3H), 1.13 (m, CHCH<sub>3</sub>, 1H), 1.40 (m, CHCH<sub>3</sub>, 1H), 1.63 (m, CH, 1H), 2.30 (dd, CH<sub>2</sub>, *J* = 13.5, 8.0 Hz, 1H), 2.55 (dd, CH<sub>2</sub>, *J* = 13.5, 6.0 Hz, 1H), 3.72 (s, OMe, 3H), 3.75 (s, OMe, 3H), 3.80 (s, OMe, 24H), 3.82 (s, OMe, 9H), 3.83 (s, OMe, 3H), 6.49 (s, Ar, 1H), 6.50 (dd, Ar-H<sub>5</sub>,,,,,, *J* = 8.0, 2.5 Hz, 1H), 6.52 (d, Ar-H<sub>3</sub>,,,,,, *J* = 2.5 Hz, 1H), 6.59 (s, Ar, 1H), 6.60 (2 x s, Ar, 3H and 1H), 6.98 (s, Ar, 1H), 7.15 (s, Ar, 1H), 7.16 (s, Ar, 1H), 7.17 (d, Ar-H<sub>6</sub>,,,,,, *J* = 8.0 Hz, 1H), 7.21 (2 x s, Ar, 2 x 1H), 7.22 (s, Ar, 1H). <sup>13</sup>C NMR (CDCl<sub>3</sub>): δ 11.53, 19.14, 29.37, 35.11, 36.68, 55.26, 55.42, 55.61, 55.78, 55.79, 55.80, 55.82, 55.84, 55.99, 95.71, 95.97, 96.08, 98.82, 104.08, 118.91, 119.07, 119.11, 119.15, 119.16, 119.21, 119.29, 119.31, 119.46, 120.32, 121.52, 132.13, 133.90, 134.78, 134.96, 134.99, 135.01, 155.99, 156.92, 156.96, 157.00, 157.02, 157.11, 157.40, 158.09, 159.84. HRMS (ESI<sup>+</sup>): *m/z* calcd for C<sub>61</sub>H<sub>68</sub>NaO<sub>14</sub> (M+Na<sup>+</sup>), 1047.45067; found, 1047.44546.

**7merRI** [5-Iodo-5''''''-(*S*)-2-methylbutyl]-  
2,4,4',6',4'',6'',4''',6''',4''''',6''''',4''''',6''''',2''''',4''''''-tetradecamethoxy-  
1,1':3',1'':3'',1''':3''',1''''':3''''',1''''':3''''',1''''''-septiphenyl]

To a solution of **7merR** (350 mg, 0.34 mmol) in THF (20 mL) was added DIH



''''',4''''''''',6''''''''',2''''''''',4'''''''''-docosamethoxy-  
 1,1':3',1'':3'',1''':3''',1''':3''',1''':3''',1''':3''',1''':3''',1''':3''',1''':3''',1''':3''',  
 ''''',1''''''''':3''''''''',1'''''''''-undeciphenyl]

To a solution of **7merRI** (320 mg, 0.278 mmol), **4merRBP** (309 mg, 0.417 mmol), and Pd(PPh<sub>3</sub>)<sub>4</sub> (16 mg, 0.014 mmol) in dehydrated toluene (6 mL) was added a degassed aqueous K<sub>2</sub>CO<sub>3</sub> solution (2 M, 1.5 mL, 3 mmol) and the mixture was stirred at 80°C for 2 days. After most of the toluene had been removed by evaporation at room temperature, the residue was extracted with CHCl<sub>3</sub>. The organic layer was dried over Na<sub>2</sub>SO<sub>4</sub>, filtered, and concentrated *in vacuo*. The crude product was purified successively by short NH<sub>2</sub>-SiO<sub>2</sub> chromatography with CHCl<sub>3</sub>, by SiO<sub>2</sub> chromatography with CHCl<sub>3</sub>/ethyl acetate (10/1, v/v), and by recycled preparative SEC chromatography with CHCl<sub>3</sub>. The CHCl<sub>3</sub> solution was evaporated and the residue was dissolved in benzene and freeze-dried to obtain **11merR2** as a slightly brownish white solid (278 mg, 0.170 mmol, 61.2% yield). **11merR2**: [ $\alpha$ ]<sub>D</sub><sup>25</sup>: +2.9° (*c* = 1.11, CHCl<sub>3</sub>). Mp: 299–301°C. IR (KBr, cm<sup>-1</sup>): 2994, 2952, 1604, 1508, 1490, 1459, 1355, 1263, 1202, 1167, 1035, 930, 897, 818. <sup>1</sup>H NMR (CDCl<sub>3</sub>):  $\delta$  0.83 (d, CHCH<sub>3</sub>, *J* = 6.5 Hz, 6H), 0.88 (t, CH<sub>2</sub>CH<sub>3</sub>, *J* = 7.5 Hz, 6H), 1.14 (m, CHCH<sub>3</sub>, 2H), 1.40 (m, CHCH<sub>3</sub>, 2H), 1.64 (m, CH, 2H), 2.30 (dd, CH<sub>2</sub>, *J* = 13.5, 8.0 Hz, 2H), 2.55 (dd, CH<sub>2</sub>, *J* = 13.5, 6.0 Hz, 2H), 3.74 (s, OMe, 6H), 3.77 (s, OMe, 12H), 3.78 (s, OMe, 12H), 3.79 (2 x s, OMe, 2 x 12H), 3.81 (2 x s, OMe, 2 x 6H), 6.49 (s, Ar, 2H), 6.58 (s, Ar, 5H), 6.59 (s, Ar, 4H), 6.98 (s, Ar, 2H), 7.17 (s, Ar, 2H), 7.19 (s, Ar, 2H), 7.21 (s, Ar, 3H), 7.22 (s, Ar, 2H). <sup>13</sup>C NMR (CDCl<sub>3</sub>):  $\delta$  11.48, 19.09, 29.32, 35.06, 36.64, 55.35, 55.72, 55.75, 55.78, 55.91, 95.65,



resulting aqueous solution was filtered by membrane filtration and the filtrate was lyophilized to obtain **11merHR2** as a slightly brown powder (82.6 mg, 0.062 mmol, 100% yield).  $[\alpha]_D^{25}$ : +4.6 ( $c = 1.06$ , CH<sub>3</sub>OH) and +107° ( $c = 0.27$ , H<sub>2</sub>O). Mp: 270°C (dec). IR (KBr, cm<sup>-1</sup>): 3399 ( $\nu_{O-H}$ ), 2959, 1611, 1497, 1408, 1280, 1163, 982, 841. <sup>1</sup>H NMR (CD<sub>3</sub>CN):  $\delta$  0.76 (d, CHCH<sub>3</sub>,  $J = 7.0$  Hz, 6H), 0.82 (t, CH<sub>2</sub>CH<sub>3</sub>,  $J = 7.5$  Hz, 6H), 1.08 (m, CHCH<sub>3</sub>, 2H), 1.33 (m, CHCH<sub>3</sub>, 2H), 1.57 (m, CH, 2H), 2.23 (dd, CH<sub>2</sub>,  $J = 13.5, 8.0$  Hz, 2H), 2.47 (dd, CH<sub>2</sub>,  $J = 13.5, 6.0$  Hz, 2H), 6.39 (s, Ar, 2H), 6.51 (s, Ar-H<sub>5</sub>''''', 1H, and s, Ar, 2H), 6.52 (2 x s, Ar, 2 x 2H), 6.53 (s, Ar, 2H), 6.85 (s, Ar, 2H), 6.98 (s, Ar, 2H), 7.01 (s, Ar-H<sub>2</sub>''''', 1H, and s, Ar, 2H), 7.03 (s, Ar, 2H), 7.05 (s, Ar, 2H), 6.0–8.0 (br, OH, 22H). <sup>1</sup>H NMR (CD<sub>3</sub>OD):  $\delta$  1.51 (d, CHCH<sub>3</sub>,  $J = 6.5$  Hz, 6H), 1.56 (t, CH<sub>2</sub>CH<sub>3</sub>,  $J = 7.5$  Hz, 6H), 1.82 (m, CHCH<sub>3</sub>, 2H), 2.09 (m, CHCH<sub>3</sub>, 2H), 2.34 (m, CH, 2H), 2.98 (dd, CH<sub>2</sub>,  $J = 13.5, 8.0$  Hz, 2H), 3.23 (dd, CH<sub>2</sub>,  $J = 13.5, 6.0$  Hz, 2H), 7.10 (s, Ar, 2H), 7.22 (s, Ar-H<sub>2</sub>''''', 1H), 7.23 (2 x s, Ar, 2 x 2H), 7.24 (s, Ar, 2H), 7.25 (s, Ar, 2H), 7.59 (s, Ar, 2H), 7.78 (s, Ar, 2H), 7.83 (3 x s, Ar, 2H, 3H and 2H). <sup>13</sup>C NMR (CD<sub>3</sub>CN):  $\delta$  11.79, 19.21, 29.97, 36.07, 37.13, 104.00, 104.78, 104.81, 104.87, 117.48, 118.75, 118.77, 118.78, 118.81, 118.82, 118.93, 119.00, 119.57, 121.52, 134.65, 135.08, 135.19, 135.20, 153.02, 154.88, 154.92, 155.12, 155.13, 155.15, 155.16, 156.07. ESI-MS (CH<sub>3</sub>OH, negative): Calcd for C<sub>76</sub>H<sub>65</sub>O<sub>22</sub> [**11merHR2**-H]<sup>-</sup>:  $m/z = 1329.40$ . Found:  $m/z = 1329.51$ . Anal. Calcd for C<sub>76</sub>H<sub>66</sub>O<sub>22</sub>·7.7H<sub>2</sub>O: C, 62.09; H, 5.58. Found: C, 62.19; H, 5.20.

## References

1. Chassaing, C.; Haudrechy, A.; Langlois, Y. *Tetrahedron Lett.* **1997**, *38*, 4415–4416.
2. Narioka, T.; Ishikawa, T. *Heterocycles* **2002**, *56*, 413–420.
3. Majetich, G.; Hicks, R.; Reister, S. *J. Org. Chem.* **1997**, *62*, 4321–4326.
4. Monkman, A. P.; Palsson, L.-O.; Higgins, R. W. T.; Wang, C.; Bryce, M.; Batsanov, A. S.; Howard, J. A. K. *J. Am. Chem. Soc.* **2002**, *124*, 6049–6055.
5. Murata, M.; Oyama, T.; Watanabe, S.; Masuda, Y. *J. Org. Chem.* **2000**, *65*, 164–168.
6. Neuteboom, E. E.; Meskers, S. C. J.; van Hal, P. A.; van Duren, J. K. J.; Meijer, E. W.; Janssen, R. A. J.; Dupin, H.; Pourtois, G.; Cornil, J.; Lazzaroni, R.; Brédas, J.-L.; Beljonne, D. *J. Am. Chem. Soc.* **2003**, *125*, 8625–8638.
7. Terao, J.; Ikumi, A.; Kuniyasu, H.; Kambe, N. *J. Am. Chem. Soc.* **2003**, *125*, 5646–5647.

## 4. Investigation of Double Helix Formation of Oligoresorcinols

### 4-1. Concentration Effect

The  $^1\text{H}$  NMR (500 MHz,  $25^\circ\text{C}$ ) spectra of **9merH** in  $\text{D}_2\text{O}$  exhibited almost no change in the range of 0.1 to 8 mM, suggesting that **9merH** forms the stable double helix within the concentration range.

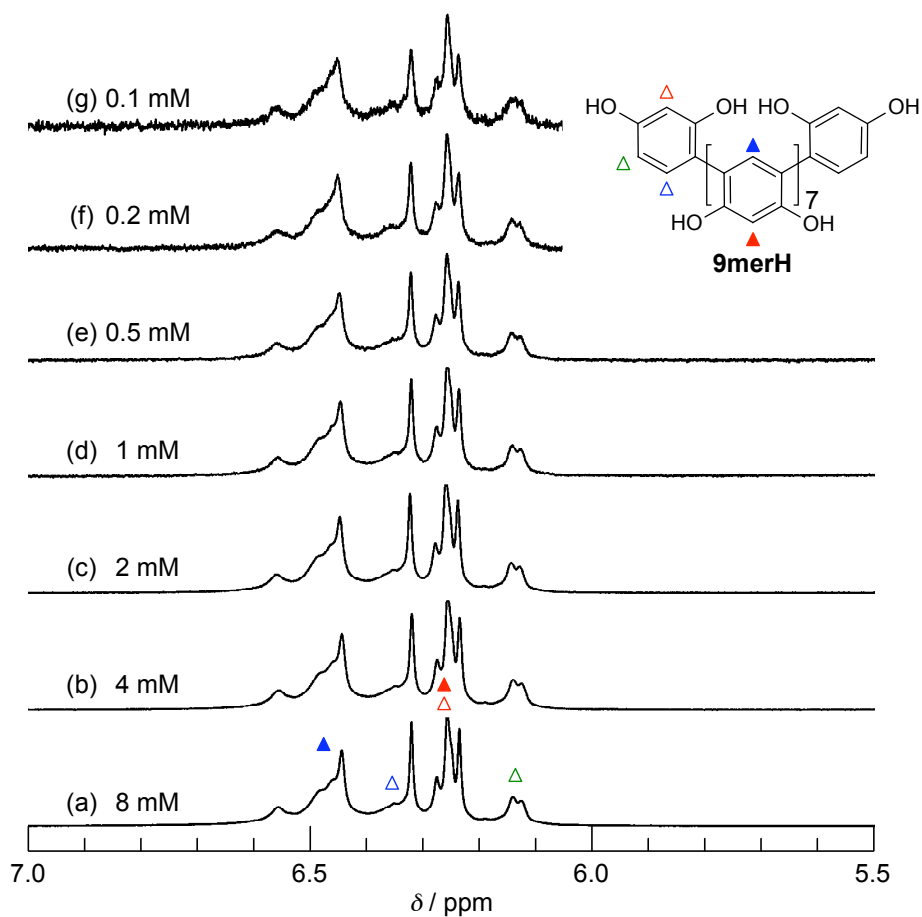

**Figure S-1.**  $^1\text{H}$  NMR spectra of **9merH** in  $\text{D}_2\text{O}$  at  $25^\circ\text{C}$ . 1,4-Dioxane in  $\text{D}_2\text{O}$  was used as the external standard.  $[\mathbf{9merH}] = 8$  (a), 4 (b), 2 (c), 1 (d), 0.5 (e), 0.2 (f), and 0.1 mM (g).

## 4-2. Temperature Effect

The  $^1\text{H}$  NMR signals of **9merH** in  $\text{D}_2\text{O}$  slightly shifted downfield and became sharper with an increase in temperature, suggesting that the double helix of **9merH** dissociates into the corresponding single strands to a lesser extent at high temperatures.

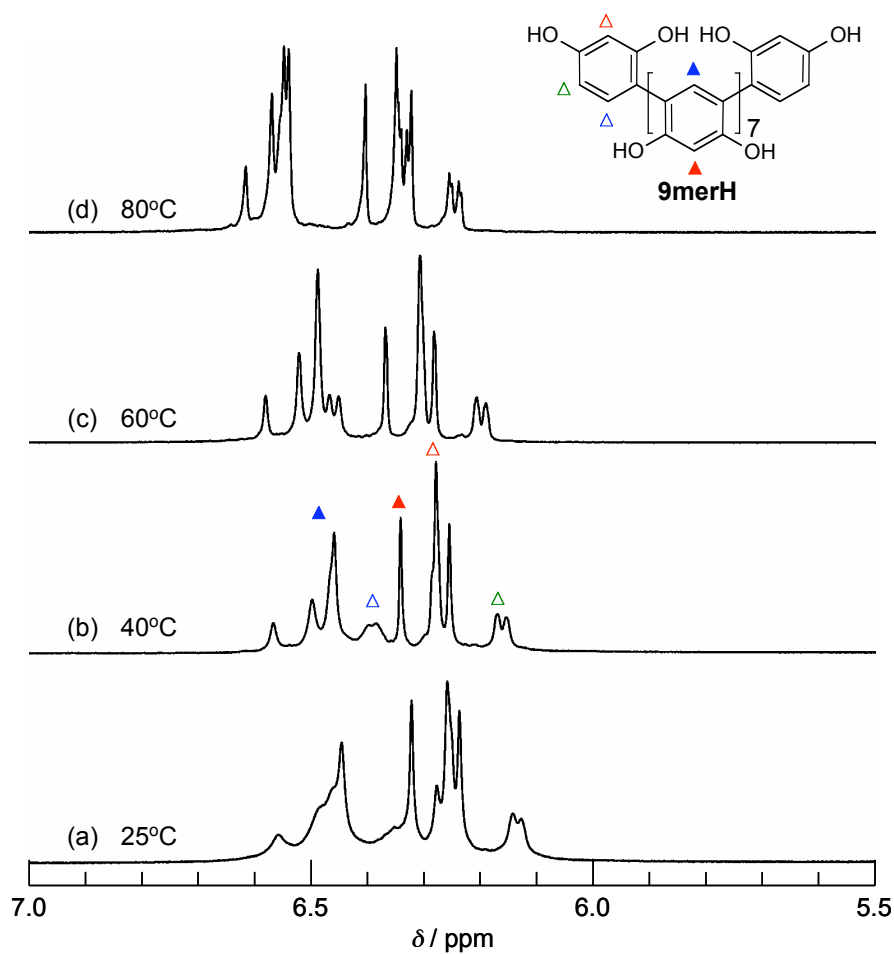

**Figure S-2.**  $^1\text{H}$  NMR spectra of **9merH** in  $\text{D}_2\text{O}$  at various temperatures. 1,4-Dioxane in  $\text{D}_2\text{O}$  was used as the external standard.

The  $^1\text{H}$  NMR signals of **9merH** in  $\text{D}_2\text{O}/\text{CD}_3\text{OD}$  (72/28, v/v) largely shifted downfield and were quite broadened compared with those in  $\text{D}_2\text{O}$ , suggesting that most of **9merH** exists as a single strand at high temperatures

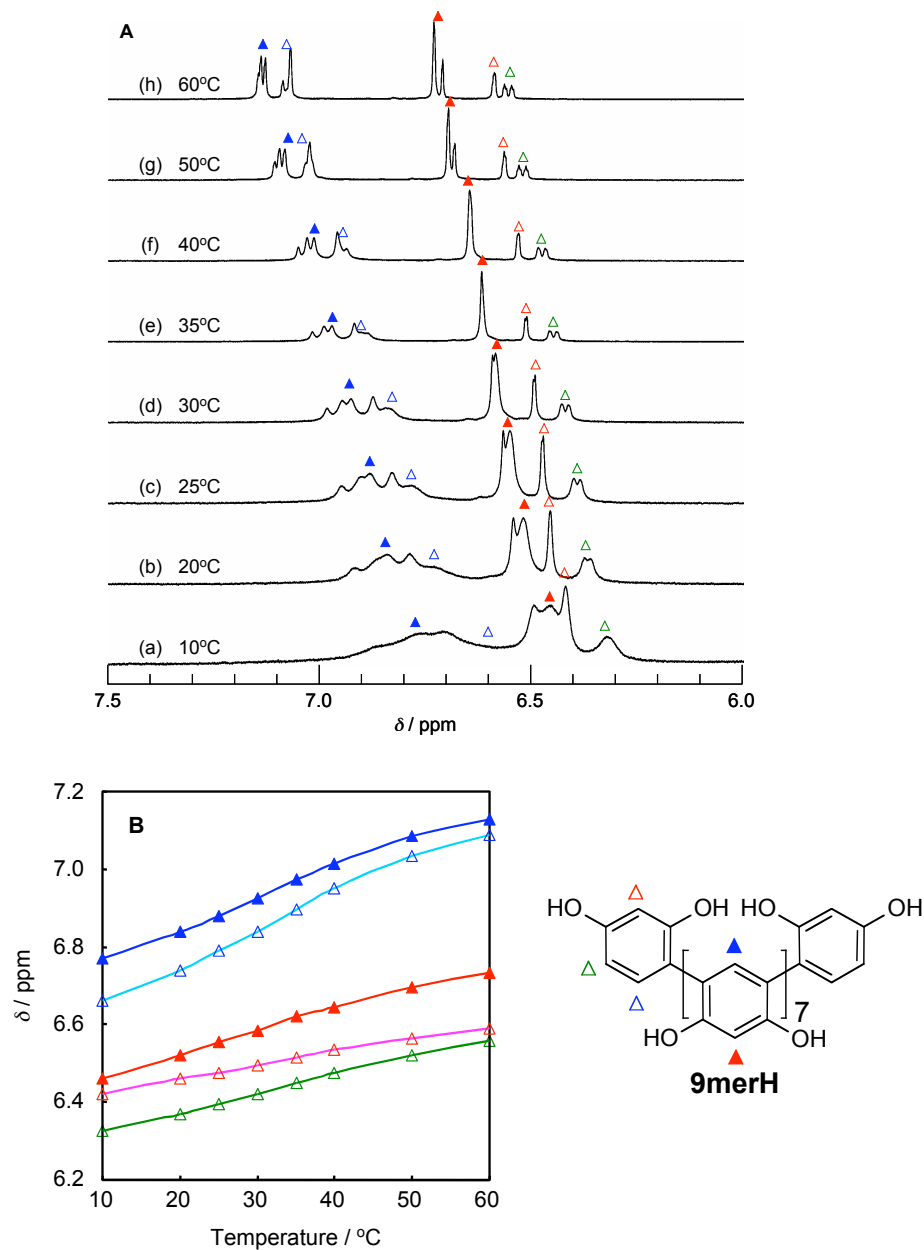

**Figure S-3.** (A)  $^1\text{H}$  NMR spectral changes of **9merH** in  $\text{D}_2\text{O}/\text{CD}_3\text{OD}$  (72/28, v/v).  $[\mathbf{9merH}] = 1 \text{ mM}$ . (B) Plots of the chemical shifts of the marked signals vs. temperature.

The  $^1\text{H}$  NMR signals of **6merH** in  $\text{D}_2\text{O}$  shifted downfield with an increase in temperature, indicating that the double helix of **6merH** favorably dissociates into the single strands at high temperatures in  $\text{D}_2\text{O}$ .

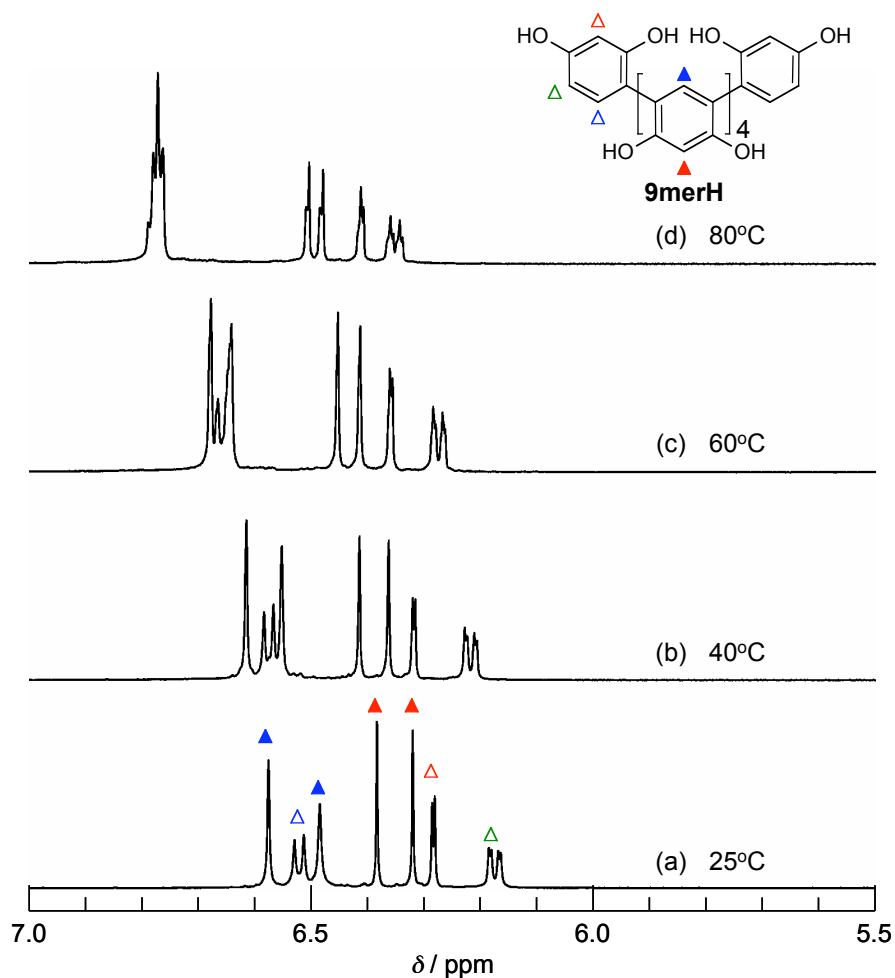

**Figure S-4.**  $^1\text{H}$  NMR spectra of **6merH** in  $\text{D}_2\text{O}$  at various temperatures. 1,4-Dioxane in  $\text{D}_2\text{O}$  was used as the external standard.

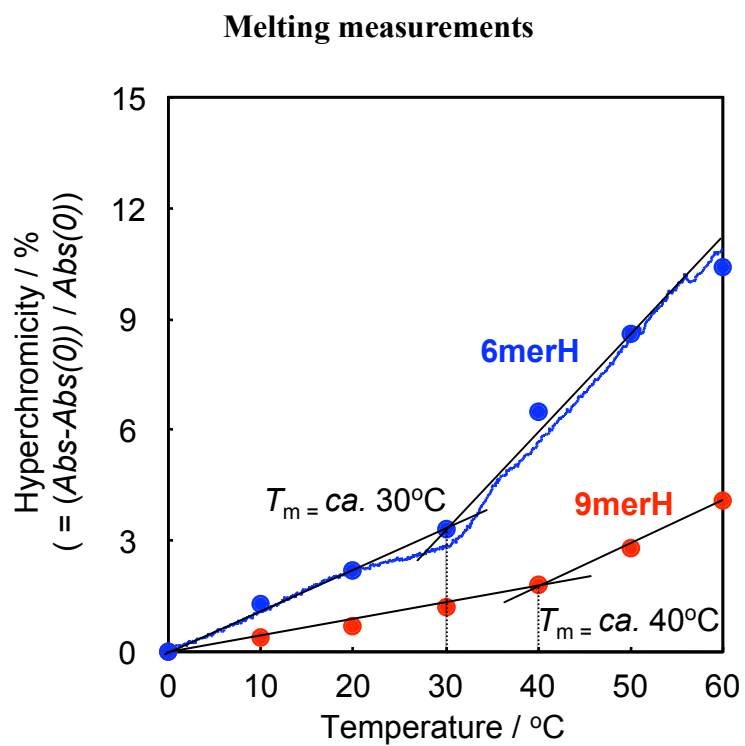

**Figure S-5.** UV melting profiles of **6merH** (blue line (heating rate 0.5 °C/min) and blue circles) and **9merH** (red circles) in H<sub>2</sub>O. [**6merH**] = 1.5 mM, [**9merH**] = 1 mM.

### 4-3. VPO Measurement

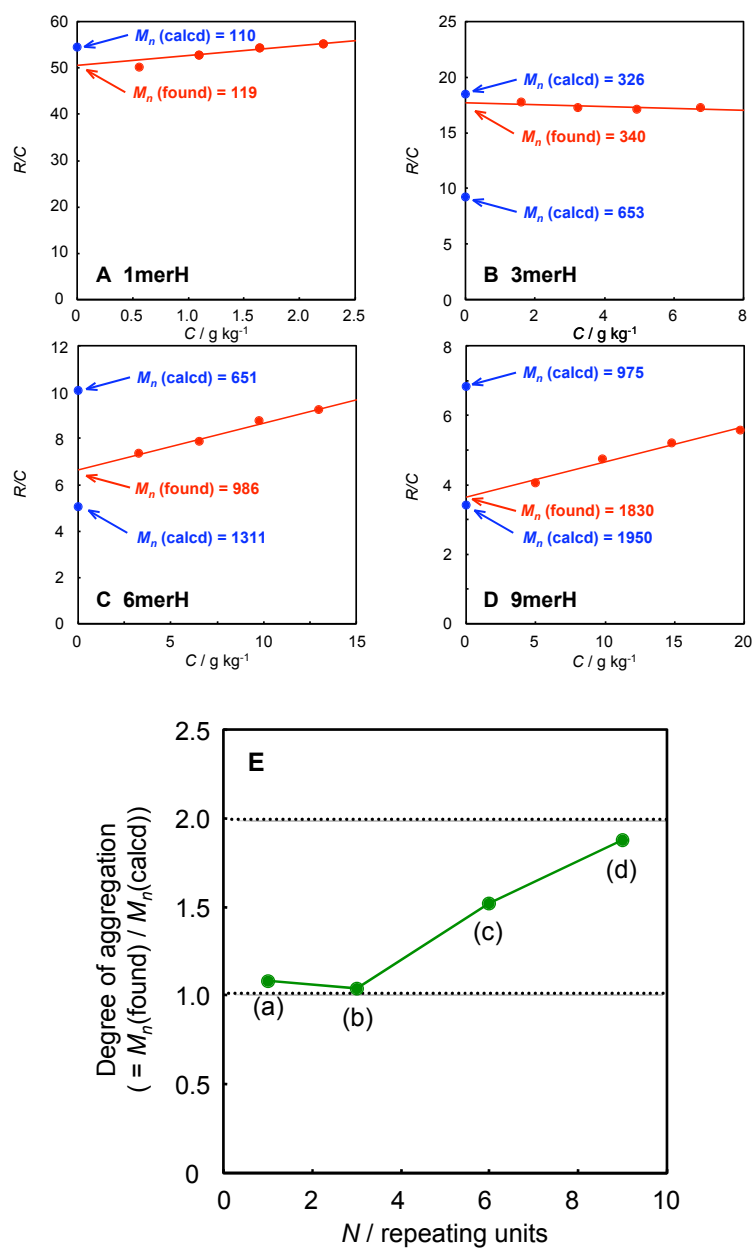

**Figure S-6.** (A–D) Plots of  $R/C$  vs. concentration of oligoresorcinols (**1merH** (A), **3merH** (B), **6merH** (C), and **9merH** (D)) in  $\text{H}_2\text{O}$  at  $40^\circ\text{C}$  ( $R$ : VPO response, arbitrary unit;  $C$ : initial concentration of oligomer). [Oligomers] = 5, 10, 15, and 20 mmol/kg. (E) Plots of the degree of aggregation of the oligomers ( $M_n(\text{found}) / M_n(\text{calcd})$ ) in  $\text{H}_2\text{O}$ .

#### 4-4. Chain Length Dependence of Absorption Spectra

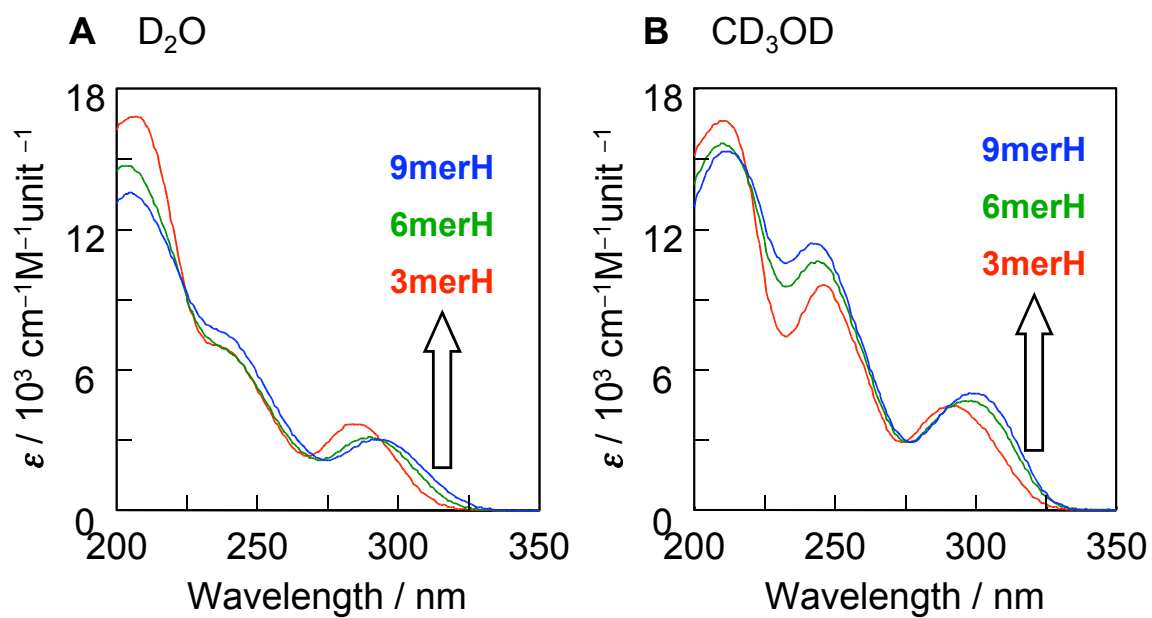

**Figure S-7.** Absorption spectra of oligoresorcinols (3merH, 6merH, and 9merH) in D<sub>2</sub>O (A) and CD<sub>3</sub>OD (B) at 25 °C.

#### 4-5. Molecular Modeling and Calculations

Molecular modeling and molecular mechanics calculations were performed using the Compass Force Field as implemented in the Materials Studio software (version 3.0; Accelrys Inc.). The models of the single strands of **9merH** and **11merHR2** were constructed using Materials Visualizer in the Materials Studio. The parameter, “relative electric” was set to 4 that is the recommended value for calculations in water. The initial conformations of the main chains of **9merH** and **11merHR2** were constructed based on the crystal structures of the poly- or oligo(*m*-phenylene) that adopt the 5<sub>1</sub>-helical conformation.<sup>1</sup> Charges on the atoms of the oligomers were calculated using the charge equilibration (QEq) in the Materials Studio; the total charge of the molecule was set to 0. The structures of the double helices of **9merH** and **11merHR2** were constructed by duplicating the initial structures of the single strands of **9merH** and **11merHR2**. The energy minimization was conducted using the Smart Minimizer of the Discover module until the root-mean-square (rms) value became less than 0.1 kcal mol<sup>-1</sup> Å<sup>-1</sup>. Molecular dynamics calculations were run for 1 ns at a constant volume and temperature (300 K) (NVT MD using the Nosé temperature thermostat<sup>2</sup>) with a step size of 1 fs, and the trajectory structures were obtained at 20 ps intervals.

The double helices of both **9merH** and **11merHR2** were calculated to be more stable than their single strands by energy minimization. Furthermore, the MD simulations showed that the double helical structures were retained after the 1 ns MD simulations at 300 K, while the single helices were broken.

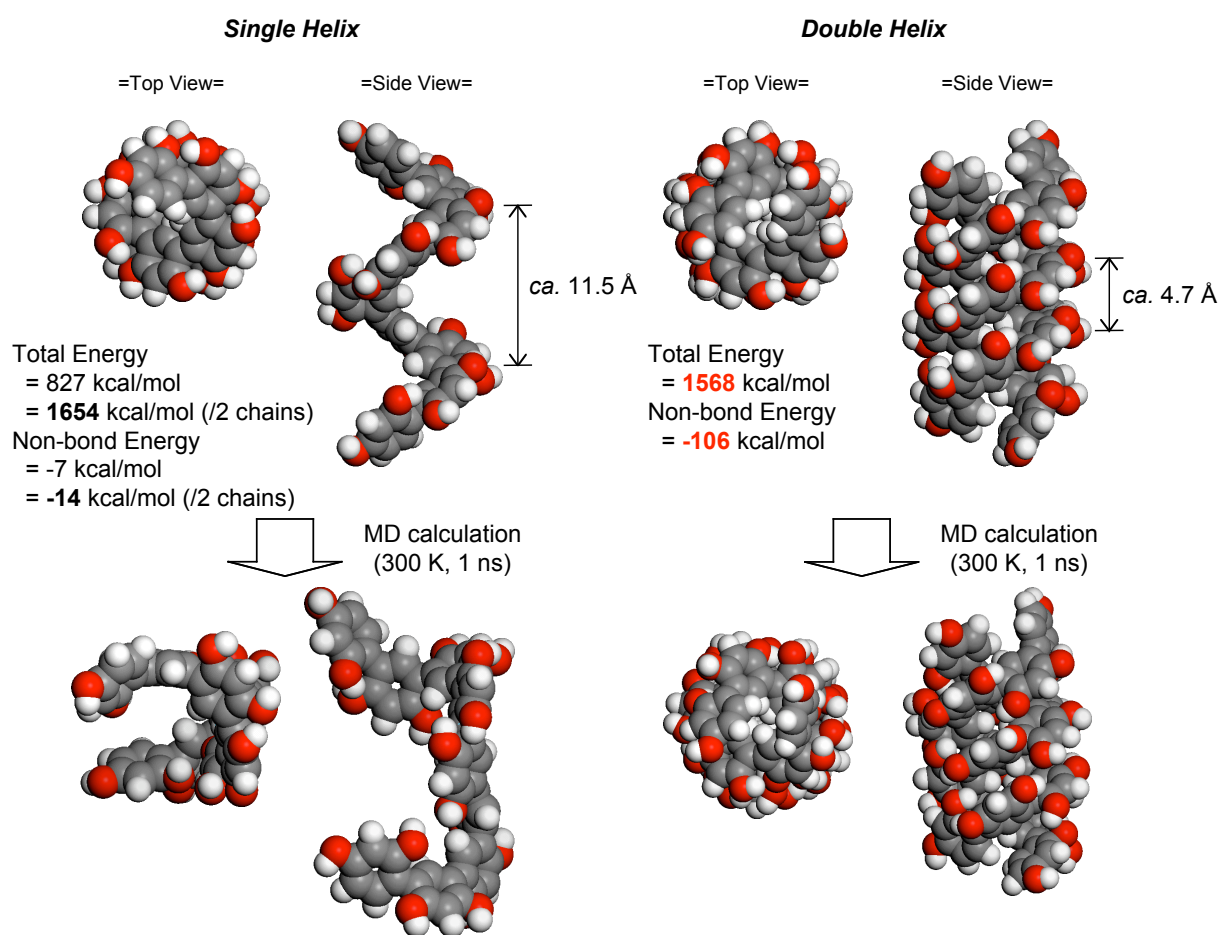

**Figure S-8.** Possible models for single and double helices of **9merH**.

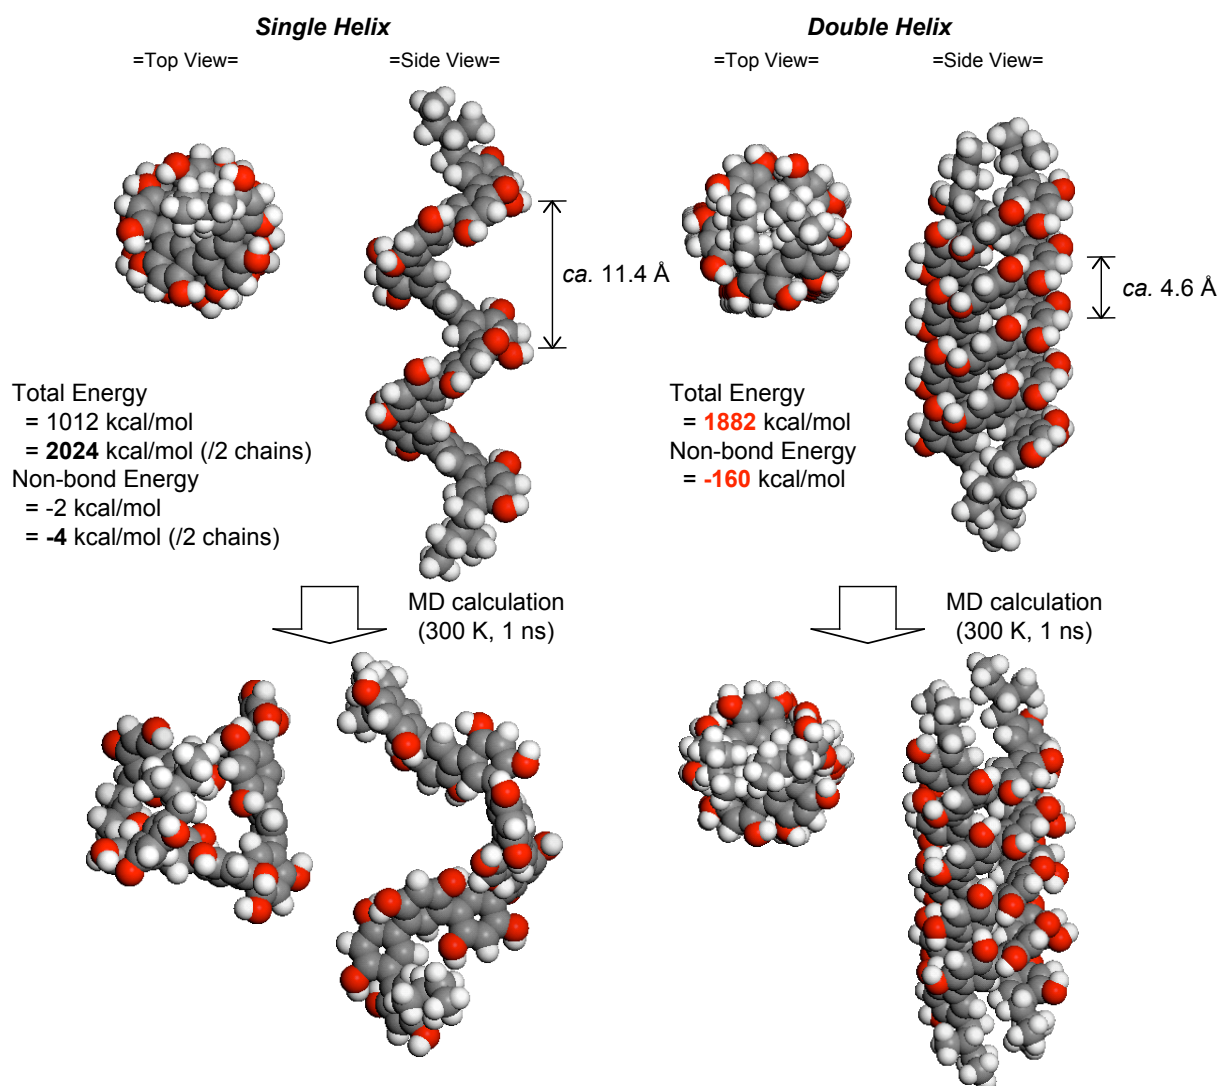

**Figure S-9.** Possible models for single and double helices of **11merHR2**.

## References

- (a) Williams, D. J.; Colquhoun, H. M.; O'Mahoney, C. A. *J. Chem. Soc., Chem. Commun.* **1994**, 1643–1644. (b) Kobayashi, N.; Sasaki, S.; Abe, M.; Watanabe, S.; Fukumoto, H.; Yamamoto, T. *Macromolecules* **2004**, *37*, 7986–7991.
- (a) Nosé, S. *Molec. Phys.* **1984**, *52*, 255–268, (b) Nosé, S. *J. Chem. Phys.* **1984**, *81*, 511–519, (c) Nosé, S. *Prog. Theoret. Phys. Supplement* **1991**, *103*, 1–46.

## 4-6. Single-Crystal X-ray Analysis

### 4-6-1. Single Helix of **5merH**

X-ray diffraction data for the single helix of **5merH** were collected on a Bruker Smart Apex CCD-based X-ray diffractometer with Mo-K $\alpha$  radiation ( $\lambda = 0.71073$  Å) at 153 K.

Single crystals of the single helix of **5merH** [ $C_{30}H_{22}O_{10} \cdot 1.2(CHCl_3) \cdot 2(H_2O)$ , Mw = 721.75] suitable for X-ray analysis were grown by slow liquid diffusion of  $CHCl_3$  into an  $CH_3CN$  solution of **5merH**, and a single colorless crystal with dimensions  $0.30 \times 0.20 \times 0.05$  mm was selected for intensity measurements. The unit cell was orthorhombic with the space group *Pbcn*. The lattice constants with  $Z = 4$ ,  $\rho_{\text{calcd}} = 1.387$  g cm $^{-3}$ ,  $\mu(\text{Mo-K}\alpha) = 0.37$  cm $^{-1}$ ,  $F(000) = 1486$ ,  $2\theta_{\text{max}} = 55.0^\circ$  were  $a = 14.0511(5)$ ,  $b = 10.1199(4)$ ,  $c = 24.3010(8)$  Å, and  $V = 3455.5(2)$  Å $^3$ . A total of 22005 reflections were collected, of which 3958 reflections were independent ( $R_{\text{int}} = 0.0360$ ). The structure was refined to final  $R_1 = 0.0875$  for 3958 data [ $I > 2\sigma(I)$ ] with 240 parameters and  $wR_2 = 0.2782$  for all data,  $GOF = 1.060$ , and residual electron density max./min. = 1.420/−0.372 e·Å $^{-3}$ .

Data collection, indexing, and initial cell refinements were carried out using the program SMART.<sup>1</sup> Frame integration and final cell refinements were performed using SAINT software.<sup>2</sup> A multiple absorption correction for each data set was applied using the program SADABS.<sup>3</sup> The structure was solved by direct methods and Fourier

techniques using the program SHELXS-97,<sup>4</sup> and refined by full-matrix least squares methods on  $F^2$  using SHELXL-97<sup>5</sup> incorporated in SHELXTL-PC.<sup>6</sup>

All non-hydrogen atoms were refined anisotropically. The C13, C16, H11, and H12 sit on special positions with an occupancy of 0.5. The H11 and H12 were found by differential-Fourier analysis and refined with  $U_{\text{iso}}(\text{H})$  values of  $1.2U_{\text{eq}}(\text{C})$ . The water hydrogen atoms were also located in differential-Fourier syntheses, but their positional and displacement parameters were refined with O-H distance restraints of 0.9 Å, and with  $U_{\text{iso}}(\text{H})$  values of  $1.5U_{\text{eq}}(\text{O})$ . The positions of other hydrogen atoms were calculated geometrically and refined as a riding model with  $U_{\text{iso}}(\text{H})$  values of  $1.2U_{\text{eq}}(\text{C})$  or  $1.3U_{\text{eq}}(\text{O})$ . A molecule of solvent  $\text{CHCl}_3$  that was gradually lost during data collection, was determined to have an occupancy of *ca.* 0.6 based on a trial refinement of occupancy parameters. This value was fixed in the subsequent refinement.

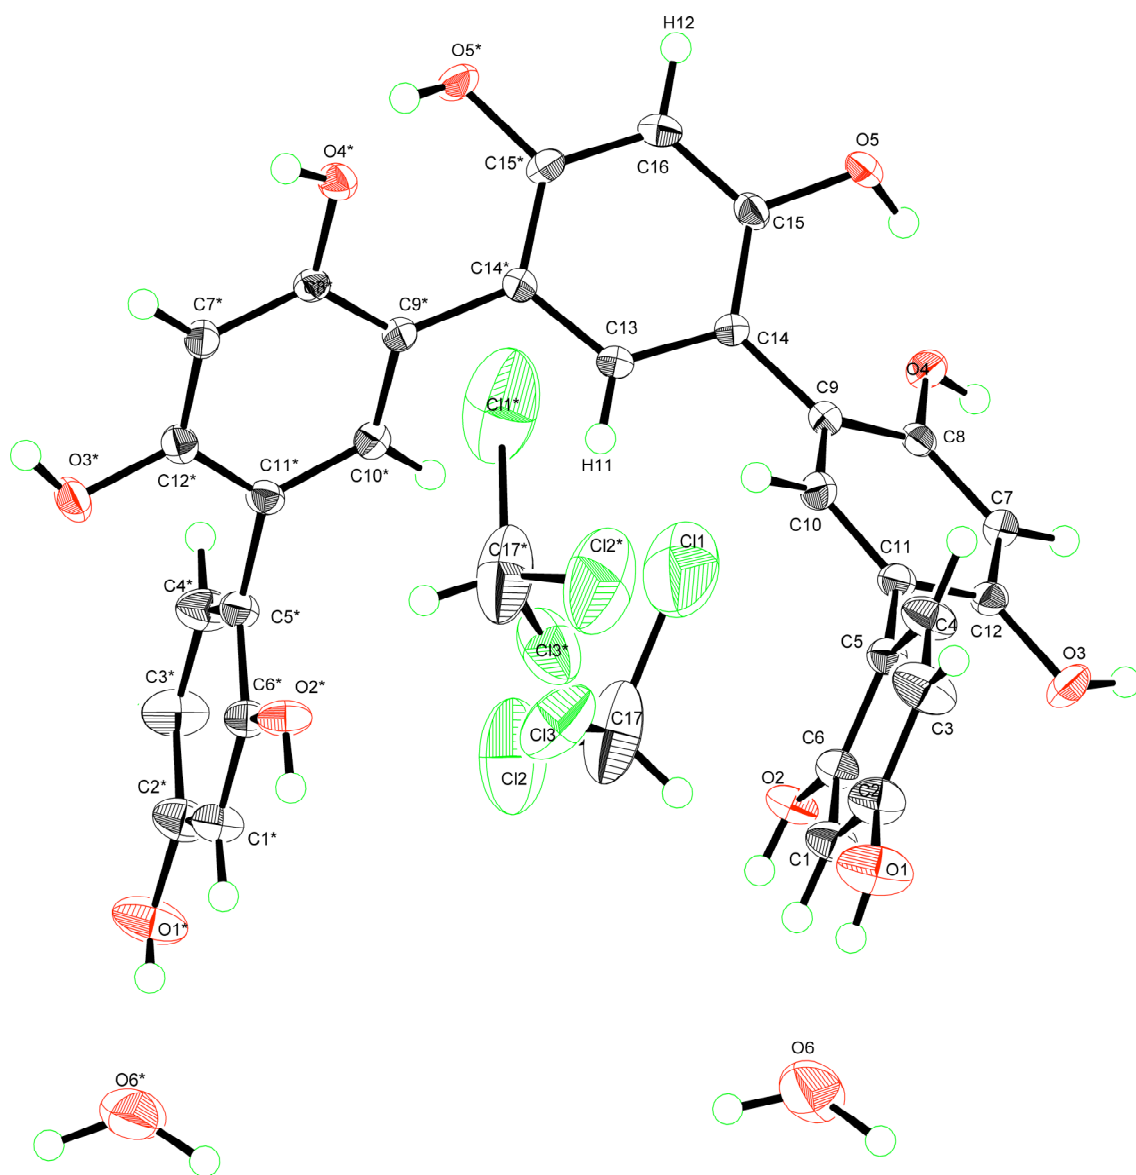

**Figure S-10.** ORTEP drawing of the single helix of **5merH** with thermal ellipsoids at 50% probability.

**Table S-1.** Crystal data and structure refinement for the single helix of **5merH** (CIF file is available in a separate file.).

|                                 |                                                                       |                     |
|---------------------------------|-----------------------------------------------------------------------|---------------------|
| Identification code             | 297375                                                                |                     |
| Empirical formula               | C <sub>31.2</sub> H <sub>27.2</sub> Cl <sub>3.6</sub> O <sub>12</sub> |                     |
| Formula weight                  | 721.75                                                                |                     |
| Temperature                     | 153(2) K                                                              |                     |
| Wavelength                      | 0.71073 Å                                                             |                     |
| Crystal system                  | <i>Orthorhombic</i>                                                   |                     |
| Space group                     | <i>Pbcn</i>                                                           |                     |
| Unit cell dimensions            | $a = 14.0511(5)$ Å                                                    | $\alpha = 90^\circ$ |
|                                 | $b = 10.1199(4)$ Å                                                    | $\beta = 90^\circ$  |
|                                 | $c = 24.3010(8)$ Å                                                    | $\gamma = 90^\circ$ |
| Volume                          | 3455.5(2) Å <sup>3</sup>                                              |                     |
| Z                               | 4                                                                     |                     |
| Density (calculated)            | 1.387 g/cm <sup>3</sup>                                               |                     |
| Absorption coefficient          | 0.371 mm <sup>-1</sup>                                                |                     |
| F(000)                          | 1486                                                                  |                     |
| Crystal size                    | 0.30 x 0.20 x 0.05 mm <sup>3</sup>                                    |                     |
| Theta range for data collection | 2.22 to 27.50°.                                                       |                     |
| Index ranges                    | $-18 \leq h \leq 16$ , $-13 \leq k \leq 6$ , $-28 \leq l \leq 31$     |                     |
| Reflections collected           | 22005                                                                 |                     |

|                                        |                                                    |
|----------------------------------------|----------------------------------------------------|
| Independent reflections                | 3958 [R(int) = 0.0360]                             |
| Completeness to $\theta = 27.50^\circ$ | 99.8%                                              |
| Absorption correction                  | Empirical                                          |
| Max. and min. transmission             | 0.979 and 0.904                                    |
| Refinement method                      | Full-matrix least-squares on $F^2$                 |
| Data / restraints / parameters         | 3958 / 1 / 240                                     |
| Goodness-of-fit on $F^2$               | 1.060                                              |
| Final R indices [ $I > 2\sigma(I)$ ]   | $R_1 = 0.0875$ , $wR_2 = 0.2515$                   |
| R indices (all data)                   | $R_1 = 0.1095$ , $wR_2 = 0.2782$                   |
| Largest diff. peak and hole            | 1.420 and $-0.372 \text{ e} \cdot \text{\AA}^{-3}$ |

#### 4-6-2. Double Helix of **5merH**

X-ray diffraction data for the double helix of **5merH** were collected on a Bruker Smart ApexII CCD-based X-ray diffractometer with Mo-K $\alpha$  radiation ( $\lambda = 0.71073$  Å) at 90 K.

Single crystals of the double helix of **5merH** [ $2(\text{C}_{30}\text{H}_{22}\text{O}_{10}) \cdot 5(\text{H}_2\text{O})$ ,  $M_w = 1164.95$ ] suitable for X-ray analysis were grown by slow evaporation of an aqueous solution of **5merH**, and a single colorless crystal with dimensions  $0.06 \times 0.04 \times 0.02$  mm was selected for intensity measurements. The unit cell was orthorhombic with the space group  $P-1$ . The lattice constants with  $Z = 2$ ,  $\rho_{\text{calcd}} = 1.507$  g cm $^{-3}$ ,  $\mu(\text{Mo-K}\alpha) = 0.12$  cm $^{-1}$ ,  $F(000) = 1208$ ,  $2\theta_{\text{max}} = 50.9^\circ$  were  $a = 11.4241(19)$ ,  $b = 12.300(2)$ ,  $c = 19.998(3)$  Å, and  $V = 2567.3(7)$  Å $^3$ . A total of 25368 reflections were collected, of which 9416 reflections were independent ( $R_{\text{int}} = 0.0459$ ). The structure was refined to final  $R_1 = 0.0715$  for 5901 data [ $I > 2\sigma(I)$ ] with 787 parameters and  $wR_2 = 0.2133$  for all data,  $GOF = 1.038$ , and residual electron density max / min =  $1.552 / -0.846$  e $\cdot$ Å $^{-3}$ .

Data collection, indexing, and initial cell refinements were carried out using the program SMART.<sup>1</sup> Frame integration and final cell refinements were performed using SAINT software.<sup>7</sup> A multiple absorption correction for each data set was applied using the program SADABS.<sup>3</sup> The structure was solved by direct methods and Fourier techniques using the program SHELXS-97<sup>4</sup> and refined by full-matrix least squares methods on  $F^2$  using SHELXL-97<sup>5</sup> incorporated in SHELXTL-PC.<sup>6</sup>

All non-hydrogen atoms were refined anisotropically. All hydrogen atoms were

calculated geometrically and refined as a riding model with  $U_{\text{iso}}(\text{H})$  values of  $1.2U_{\text{eq}}(\text{C})$  or  $1.3U_{\text{eq}}(\text{O})$ . The water hydrogen atoms were not located because they have disordered configurations.

**Figure S-11.** ORTEP drawing of the double helix of **5merH** with thermal ellipsoids at 50% probability.

**Table S-2.** Centroid–Centroid Separations for Pairs of Aromatic Rings

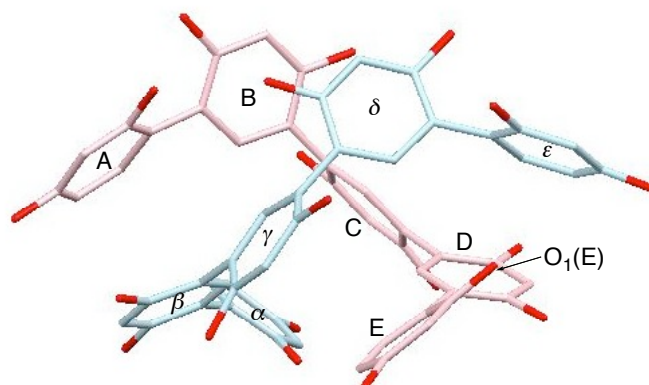

| Interaction                                    | Mode          | Distance / Å | Angle / deg <sup>a)</sup> |
|------------------------------------------------|---------------|--------------|---------------------------|
| A... $\beta$                                   | $\pi$ - $\pi$ | 3.937        | 17.92                     |
| C... $\alpha$                                  | $\pi$ - $\pi$ | 4.016        | 19.75                     |
| D... $\varepsilon$                             | $\pi$ - $\pi$ | 4.324        | 35.86                     |
| E... $\gamma$                                  | $\pi$ - $\pi$ | 4.189        | 18.99                     |
| B $\rightarrow$ $\beta$                        | CH- $\pi$     | 5.675        | 58.16                     |
| C $\rightarrow$ $\delta$                       | CH- $\pi$     | 5.593        | 81.90                     |
| $\beta$ $\rightarrow$ C                        | CH- $\pi$     | 5.886        | 63.94                     |
| $\gamma$ $\rightarrow$ B                       | CH- $\pi$     | 5.754        | 80.38                     |
| $\delta$ $\rightarrow$ E                       | CH- $\pi$     | 5.776        | 70.04                     |
| O <sub>1</sub> (E) $\rightarrow$ $\varepsilon$ | OH- $\pi$     | 3.426        | —                         |

a) Defined by the two mean planes of the aromatic rings.

**Table S-3.** Crystal data and structure refinement for the double helix of **5merH** (CIF file is available in a separate file.).

|                                 |                                          |                             |
|---------------------------------|------------------------------------------|-----------------------------|
| Identification code             | 297376                                   |                             |
| Empirical formula               | C60 H44 O25                              |                             |
| Formula weight                  | 1164.95                                  |                             |
| Temperature                     | 90(2) K                                  |                             |
| Wavelength                      | 0.71073 Å                                |                             |
| Crystal system                  | <i>Triclinic</i>                         |                             |
| Space group                     | <i>P-1</i>                               |                             |
| Unit cell dimensions            | $a = 11.4241(19) \text{ Å}$              | $\alpha = 98.767(2)^\circ$  |
|                                 | $b = 12.300(2) \text{ Å}$                | $\beta = 105.237(2)^\circ$  |
|                                 | $c = 19.998(3) \text{ Å}$                | $\gamma = 103.483(2)^\circ$ |
| Volume                          | 2567.3(7) Å <sup>3</sup>                 |                             |
| Z                               | 2                                        |                             |
| Density (calculated)            | 1.507 g/cm <sup>3</sup>                  |                             |
| Absorption coefficient          | 0.119 mm <sup>-1</sup>                   |                             |
| F(000)                          | 1208                                     |                             |
| Crystal size                    | 0.06 x 0.04 x 0.02 mm <sup>3</sup>       |                             |
| Theta range for data collection | 1.08 to 25.43°.                          |                             |
| Index ranges                    | -13 ≤ h ≤ 13, -14 ≤ k ≤ 14, -24 ≤ l ≤ 24 |                             |
| Reflections collected           | 25368                                    |                             |

|                                        |                                                    |
|----------------------------------------|----------------------------------------------------|
| Independent reflections                | 9416 [R(int) = 0.0459]                             |
| Completeness to $\theta = 27.50^\circ$ | 99.2%                                              |
| Absorption correction                  | Empirical                                          |
| Max. and min. transmission             | 0.9976 and 0.9929                                  |
| Refinement method                      | Full-matrix least-squares on $F^2$                 |
| Data / restraints / parameters         | 9416 / 0 / 787                                     |
| Goodness-of-fit on $F^2$               | 1.038                                              |
| Final R indices [ $I > 2\sigma(I)$ ]   | $R_1 = 0.0715$ , $wR_2 = 0.1822$                   |
| R indices (all data)                   | $R_1 = 0.1219$ , $wR_2 = 0.2133$                   |
| Largest diff. peak and hole            | 1.556 and $-0.849 \text{ e} \cdot \text{\AA}^{-3}$ |

## References

1. Bruker. SMART Version 5.624: Program for collecting frames of data, indexing reflection, and determination of lattice parameters; Bruker AXS, Inc., Madison, Wisconsin, USA, 2000.
2. Bruker. SAINT Version 6.02: Program for integration of the intensity of reflections and scaling; Bruker AXS, Inc., Madison, Wisconsin, USA, 2000.
3. Sheldrick, G. M. SADABS Version 2.03: Program for Performing Absorption Corrections to Single-Crystal X-ray Diffraction Patterns; University of Göttingen, Göttingen, Germany, 2001.
4. Sheldrick, G. M. SHELXS-97: Program for the Solution of Crystal Structures; University of Göttingen, Göttingen, Germany, 1997.

5. Sheldrick, G. M. SHELXL-97: Program for the Refinement of Crystal Structures; University of Göttingen, Göttingen, Germany, 1997.
6. Bruker. SHELXTL Version 5.10: Suite of Programs for Crystal Structure Analysis, Incorporating Structure Solution (XS), Least-Squares Refinement (XL), and Graphics (XP); Bruker AXS, Inc., Madison, Wisconsin, USA, 2000.
7. Bruker. SAINT Version 7.12: Program for integration of the intensity of reflections and scaling; Bruker AXS, Inc., Madison, Wisconsin, USA, 2000.
